1

2 **TITLE: Neonatal endotoxin stimulation was associated with long- term innate**  
3 **immune markers and an anti-allergic response in bronchiolar epithelium in spite**  
4 **of allergen challenge**

5 **AUTHORS:** Luciana N García <sup>1,2</sup>, Carolina Leimgruber<sup>2</sup>, Juan P. Nicola<sup>3,4</sup>, Amado A  
6 Quintar<sup>1,2</sup>, Cristina A Maldonado<sup>1,2</sup>

7 <sup>1</sup>Centro de Microscopía Electrónica, Facultad de Ciencias Médicas, Universidad  
8 Nacional de Córdoba.

9 <sup>2</sup>Instituto de Investigaciones en Ciencias de la Salud (INICSA), Consejo Nacional de  
10 Investigaciones Científicas y Técnicas (CONICET), Córdoba, Argentina.

11 <sup>3</sup>Departamento de Bioquímica Clínica, Facultad de Ciencias Químicas, Universidad  
12 Nacional de Córdoba.

13 <sup>4</sup> Centro de Investigaciones en Bioquímica Clínica e Inmunología (CIBICI), Consejo  
14 Nacional de Investigaciones Científicas y Técnicas (CONICET), Córdoba, Argentina

15 **Corresponding author:**

16 Dr. Luciana N Garcia

17 Pab. Biología Celular 1º piso, Haya de la Torre esq. Enrique Barros,

18 Ciudad Universitaria, X5000HRA Córdoba, Argentina. Tel/FAX: 54 0351  
19 4333021. E-mail: [binlugarcia@gmail.com](mailto:binlugarcia@gmail.com)

20

## 21 **ABSTRACT**

22 Asthma is a heterogeneous disease underlying different medical processes, being the  
23 allergic asthma, with an early-onset in childhood, the most common type. In this  
24 phenotype, the continuous exposure to allergens produces a Th2-driven airway  
25 remodeling process that leads to symptoms and pathophysiological changes in asthma.  
26 Strategies as the avoidance of aeroallergen exposure in early life have been tested to  
27 prevent asthma, without a clear success. Alongside, several mouse models of  
28 aeroallergen challenge have dissected potential homeostatic responses by which  
29 environmental microbial stimulation reduces the subsequent allergic inflammation in  
30 the offspring. This suggests the onset of underlying preventive mechanisms in the  
31 beginning of asthma that have not been fully recognized. In this study, we aimed to  
32 evaluate if neonatal LPS-induced stimulus in epithelial host defenses could contribute to  
33 the prevent asthma in adult Balb/c mice. For this purpose, we studied the response of  
34 bronchiolar club cells (CC) that are situated in the crossroads of the host defense and  
35 allergic inflammation, and express specific pro and antiallergic proteins. LPS stimulus  
36 in the neonatal life intensified the production of TLR-4, TNF $\alpha$ , and natural anti-allergic  
37 products (CCSP and SPD), changes that contributed to prevent asthma triggering in  
38 adulthood. At epithelial level, CC skipped the mucous metaplasia, declining the  
39 overproduction of mucin via the EGFR pathway and the mice expressed normal  
40 breathing patterns in front of OVA challenge. Furthermore, the overexpression of  
41 TSLP, an epithelial pro-Th2 cytokine was blunted and normal TSLP and IL-4 levels  
42 were found in bronchoalveolar lavage (BAL). Complementing this shift, we also  
43 detected lower eosinophilia in BAL while an increase in phagocytes as well as in  
44 regulatory cells (CD4+CD25+FOXP3+ and CD4+IL-10+) was seen, whit an elevation  
45 in IL-12 and TNF $\alpha$  secretion. Summarizing, our study pointed to stable asthma-

46 preventive effects promoted by neonatal LPS-stimulation; the main finding was the  
47 increase of several anti-Th2 specific proteins at epithelial level, together with an  
48 important diminution of pro-Th2 TSLP, conditions that promoted changes in the local  
49 immune response with Treg. We thus evidenced several anti-allergic dynamic  
50 mechanisms overlying in the epithelium that could be favored in an adequate  
51 epidemiological environment

52 **KEY WORDS:**

53 Club cell, asthma, pulmonary host defense, antiallergic proteins

54 .

## 55 INTRODUCTION

56 Asthma is a heterogeneous disease with diverse underlying processes and many  
57 clinical expressions. The most common phenotype is the allergic asthma that has an  
58 early-onset in childhood. This phenotype is associated with a family history of allergic  
59 diseases, and is characterized by chronic airways inflammation, with activated mast  
60 cells, increased numbers of eosinophils, T cells, natural killer T cells, and CD4+ T  
61 helper (Th) 2 cells that release IL-4, IL-13, and IL-5. Additionally, IgE-secreting B cells  
62 are induced during the asthma process (1, 2). In this phenotype, the continuous exposure  
63 to allergens produces several consequences in the structure and function of the airways,  
64 with the establishment of a remodeling process that includes mucus hypersecretion,  
65 smooth muscle hyperplasia, subepithelial fibrosis, blood vessel proliferation and the  
66 infiltration of inflammatory cells (3). All these effects provoke airways narrowing, a  
67 common final pathway to symptoms and physiological changes in asthma (1). However,  
68 the avoidance of airborne allergen exposure in the early life has been tested in  
69 randomized clinical trials and has not been successful in preventing asthma  
70 development, suggesting underlying mechanisms in the beginning of asthma that have  
71 not been fully recognized so far (4, 5).

72 The progressive rise in allergic diseases in the last decades denotes the  
73 involvement of environmental factors in their pathophysiology (6). Based on  
74 epidemiological evidence, the hygiene hypothesis (HH) infers that the reduction of the  
75 early life infections due to the modern lifestyle weakens their protective effects against  
76 allergic disorders (7). In correlation, recent studies showed low childhood prevalence of  
77 allergy/asthma in rural areas as compared with urban areas, related to the perinatal  
78 microbial exposure, mainly to the high levels of endotoxins present in dust samples (8-  
79 12). In addition, several mouse models have dissected potential immune mechanisms by  
80 which environmental microbial stimulation, including the perinatal lipopolysaccharide  
81 (LPS) stimulus, of the airways mucosa reduces the allergic inflammation to airborne  
82 allergen challenge in the offspring, while favoring homeostatic responses (13-22).

83 In steady state, the homeostasis of the airways relies on the bronchioalveolar  
84 cells (23, 24). For this purpose, airways epithelial cells (AECs) express inflammatory,  
85 anti-inflammatory, chemoattractant, antimicrobial mediators, as well as pattern  
86 recognition receptors (PRRs) to detect environmental molecules as endotoxin, and  
87 initiate an innate immune response by activating dendritic cells (DC) (25). This link  
88 between innate and adaptive immunity has evidenced a significant role of AECs in lung

89 immunity and highlighted that an abnormal epithelial response may lead to a chronic  
90 inflammatory response (26).

91 When AECs take contact with inhaled stimuli, which contain multiple  
92 proteolytic allergens as well as microbial contaminant, they are induced to produce ROS  
93 and pro-Th2 cytokines like TSLP, IL-25 and IL-33. These cytokines interact by cell-  
94 cell communications with subepithelial DC, mast cells as well as innate lymphoid cells,  
95 which in turn trigger the recruitment of Th 2 cells, leading to an amplified Th-2  
96 cytokines production in the airways (27, 28) (29) (24, 30).

97 Additionally, there is accumulative evidence about AECs intrinsic alterations in  
98 childhood asthma that render airways more vulnerable to airborne allergens and  
99 predispose them to Th2- responses (31-34). These data indicate that AECs are essential  
100 controller of the immune response to allergens and may be an early player in order to  
101 bias a Th2 response in the immature immunity system. Therefore, AECs play a  
102 particular role since they are situated at the crossroad of the innate host defense and  
103 allergic inflammation.

104 Such contrasting activities are clearly exemplified by bronchiolar club cells  
105 (CC). They perform a myriad of homeostatic mechanisms including detoxification of  
106 xenobiotics and being a stem/progenitor cell to the airways AECs (35, 36).  
107 Additionally, CC directly contribute to host defenses by secreting monocyte and  
108 neutrophil chemoattractants, the antibacterial collectin surfactant protein (SP) D and the  
109 anti-inflammatory club cell secretory protein (CCSP) (37-43). However, under allergic  
110 genetic predisposition, CC can also activate elicited a Th2-inflammation via IL-4  
111 receptor, driving eosinophil accumulation by producing eotaxin. Furthermore, they are  
112 the principal cells to undergo epidermal growth factor receptor (EGFR)-mediated  
113 mucous metaplasia as demonstrated in experimental models of asthma (29, 44-46).  
114 Interestingly, both SP-D and CCSP, play a direct role suppressing allergic inflammation  
115 in vivo and in vitro, inciting Th1 cytokines increment under LPS-stimulus. There is  
116 quite evidence of the reduction of these mediators in allergic/asthmatic patients as well  
117 as in mouse models of asthma (37, 40, 41, 47-54).

118 The potential of CC to respond to Th1 inflammatory stimulus, activating protective  
119 mechanisms, has often been applied in studies to evidence if this protective role of  
120 epithelium prevents the development of Th2 inflammation. In a previous study we

121 reported that LPS pre-exposition to the allergen sensitization partially avoids mucous  
122 metaplasia of CC. In consequence, the loss of anti-allergic products in CC and alveolar  
123 adult mice macrophages were prevented. We observed a reduction of eosinophil influx,  
124 Interleukin-4 levels and airway hyperreactivity, while the T-helper type 1 related  
125 cytokines IL-12 and Interferon-g were enhanced (55). Considering early life as a better  
126 window of opportunity for triggering an appropriate maturation of innate immunity. In  
127 this study, we aimed to evaluate if LPS-stimulation during the neonatal lapse provides  
128 better asthma-preventive effects to preserve adult AECs from the Th2-driven  
129 inflammation. Mainly evaluating the role of bronchiolar CC and the preservation of  
130 their pro and antiallergic proteins.

131

132

## 133 MATERIALS AND METHODS

### 134 Animals

135 Balb/c mice were provided by Fun Vet (Universidad Nacional de La Plata,  
136 Argentina) and housed under controlled temperature and lighting conditions, with free  
137 access to tap water and commercial lab chow (GEPESA FEEDS, Buenos Aires,  
138 Argentina). Animals were randomly assigned to four groups (n= 6 each) and  
139 experiments were repeated at least three times.

140 The animal care and experiments were conducted following the  
141 recommendations of Helsinki convention, and in compliance with local laws on the  
142 ethical use of experimental animals.

### 143 Experimental design

144 *Neonatal treatment:* Offspring Balb/c mice were exposed to intranasal applications on  
145 every second day from days 3 to 13 of life. While one group of animals were sham  
146 treated with PBS, the other received LPS (1 $\mu$ g/5 $\mu$ l; *Escherichia coli* O55:B5 Sigma-  
147 Aldrich; St. Louis, MO, USA) according to protocols previous optimized for volume  
148 (16) and treatment timing (19).

149 *Allergen sensitization:* At the age of 4 weeks, all female animals were selected and  
150 sensitized by subsequent i.p injections of 0.1 ml of OVA grade VI (1000  $\mu$ g, Sigma-  
151 Aldrich) absorbed to 1 mg of imject Alum (Pierce Rockford, USA) on the 4 and 6  
152 weeks of life.

153 *Airway challenge:* Ten days later, neonatally (n) LPS-treated mice as well as PBS-  
154 exposed were divided into 2 groups. Whereas LPSn/OVA and PBSn/OVA mice were  
155 challenged daily (on 10 consecutive days) by an intranasal application of 50 $\mu$ l of 1%  
156 OVA, LPSn and PBSn mice were submitted to intranasal application of saline ( Fig 1a).

157 Then, after 24h, mice were sacrificed and processed according to the specific methods  
158 outlined below.

159 **Fig 1. Experimental design and allergic inflammatory state.**

160 (a) Timeline diagram and protocols employed in this study. (b) Differential  
161 quantification of cell populations in bronchioalveolar lavage (BAL). Bar graph  
162 represent total number of macrophages, eosinophils, neutrophils and lymphocytes in  
163 BAL. (c) and (d): Levels of IL-4 and TSLP by ELISA. (e) Score of respiratory  
164 distress. The score represents increasing signs of respiratory distress obtained in the  
165 first minute after intranasal challenge in all groups. Data represent mean  $\pm$  SD  
166 \*\*\*p<0.001 vs PBSn,\*\* p<0.01 vs PBSn, \*p<0.05 vs PBSn, ●● p <0.01 vs  
167 PBSn/OVA

168

169 **Lung histopathology**

170 Morphological analysis was conducted in the right lungs of 3 mice per group as  
171 previously described. Briefly, at least in 3 experiments, lungs were differentially fixed  
172 for either ultrastructural or histopathology analysis by intratracheal perfusion and  
173 processed in order to being examined under electron microscope (Zeiss LEO 906E) or  
174 light microscope (Axiostar Plus, Zeiss, Germany).

175 **Mucous cell staining**

176 The Alcian blue-periodic acid Schiff (AB-PAS) staining technique as previously  
177 described identified Mucous-secreting cells in the bronchiolar epithelium.  
178 Photomicrographs at x400 were taken using a light microscope equipped with a digital  
179 camera (Axiocam ERc5s). A total of 20-30 bronchioles (900-1700  $\mu$ m diameter) per  
180 mouse were analyzed, and the numbers of AB-PAS positive cells present in epithelia  
181 lining per 100 $\mu$ m of basement membrane were quantified using Image J Software (NIH  
182 version 1.43).

183 **Immunohistochemical analysis of lung tissue**

184 Immunohistochemical staining was performed as described elsewhere . Briefly, after  
185 being blocked, the sections were incubated overnight at 4°C with antibodies recognizing



186 SP-D (1:1000-Chemicon, Temecula, CA, USA), TNF $\alpha$  (1:50 - Hycult, Plymouth  
187 Meeting, USA), CCSP (CC10 antibody 1:1000 - Santa Cruz Biotechnology, Santa Cruz,  
188 CA, USA ), TLR4 (1:100- Santa Cruz Biotechnology), TSLP (1:200- Gene Tex, USA)  
189 or pEGFR (1:50 - Santa Cruz Biotechnology), with bound antibodies being detected  
190 using anti-rabbit (for SP-D, TNF $\alpha$ , TSLP and CCSP) or anti-goat (for TLR4 and  
191 pEGFR) biotin-labeled antibodies (Vector Laboratories, Burlingame, CA, USA) in 1%  
192 PBS-BSA. The sections were then incubated with ABC complex (VECTASTAIN  
193 Vector Labs, Southfield, MI, USA). Diaminobenzidine (DAB, Sigma-Aldrich), which  
194 was used as a chromogen substrate, and the bronchioles (700-1400  $\mu$ m diameter) were  
195 analyzed and photomicrographs x 400 were taken.

#### 196 **Bronchoalveolar lavage collection and cell counting**

197 Bronchoalveolar lavage (BAL) were obtained (n= 9 mice/group in three different  
198 experiment) as described elsewhere (52). Briefly, after three serial intra-tracheal  
199 instillations of 1 ml PBS, the cells obtained were centrifuged at 200g, resuspended and  
200 counted meanwhile the supernatant was stored at -70°C for ELISA.

201 For cytopsin preparations, about  $12.5 \times 10^4$  cells from the pellets were cytocentrifuged  
202 onto slide, whereas some slide were preserved at -70°C for immunofluorescence, others  
203 were stained with May Grünwald-Giemsa (Biopur Diagnostic, Rosario, Argentina) and  
204 counted. The cell populations were evaluated for two samples per mouse, and a total of  
205 2400 cells per group were counted.

#### 206 **Immunofluorescence**

207 Cytospin preparations (3 per mice) obtained from the BAL (3 mice per group)  
208 were withdraw at room temperature at immediately fixed with 4% formaldehyde,  
209 permeabilized with 0.25% Triton X-100 in PBS and incubated for 1 h in 5% PBS-BSA  
210 to block non-specific binding. Slides were double immunostained by incubating

211 overnight at 4°C with a mix of anti-CD4 conjugated with PERCP (BioLegend, San  
212 Diego, CA, USA) and anti IL-10 conjugated with PE (BD Biosciences Pharmingen, San  
213 Diego, CA) and mounted using fluoromount containing DAPI. Afterwards, the cells  
214 were viewed with Fluoview 1000 Confocal and laser scanning microscope, (Olympus,  
215 Tokyo, Japan) and serial x 60 microphotographs (10 per coverslide) were collected,  
216 with all double immunostained cells being evaluated in three different experiments and  
217 the relative percentages were calculated.

### 218 **Flow cytometry**

219 Pellet cells obtained from BAL (n= 5 mice/group in three different experiment)  
220 were incubated with a mix of conjugated antibodies (Biolegend) for the following T-cell  
221 subset superficial markers: APC-Cy7 anti-mouse CD45 (1:600); FITC anti-mouse CD4  
222 (1:200); PerCP anti- mouse CD25 (1:200) for 30 min at 4°C. Next, the cells were fixed  
223 (CITOFIX; BD Biosciences Pharmingen, San Diego, CA) for 20 min at 4°C and  
224 permeabilized with Perm/Wash (BD Biosciences Pharmigen), before being incubated  
225 with a dilution 1:30 of the intracytoplasmic antibody: APC anti mouse FOXP3  
226 (eBioscience) for 30 min at 4°C. Finally, the cells were washed, suspended in filtered  
227 PBS ( $1 \times 10^5$  events/experimental treatment), and analyzed by flow cytometry  
228 (FACSCanto II Flow Cytometer, BD Biosciences, San Diego, CA, USA). Data analysis  
229 was carried out using the FlowJo software (Tree Star, Ashland, OR).

### 230 **Immunoblotting**

231 By Western Blot SP-D, TLR4 and TNF $\alpha$  levels were determined in total lung  
232 homogenates from 3 animals per group in three different experiments as was described  
233 (52). Briefly, after proteins were measured with a Bio-Rad kit (Bio-Rad Laboratories,  
234 Hercules, CA, USA), the denatured protein samples were separated on 12% SDS-PAGE  
235 and blotted onto a Hybond-C membrane (Amersham Pharmacia-GE, Piscataway, NJ,

236 USA). Membranes were then blocked with 5% defatted dry milk in TBS/0.1% Tween  
237 20, and incubated for 3h with one of the following antibodies: rabbit anti-SP-D (1:1000  
238 - Chemicon, rabbit anti TNF $\alpha$  (1:50 – Hycult) or mouse anti-TLR4 (1:300 Abcam,  
239 Maryland, USA). Blots were incubated with a peroxidase-conjugated (HRP) anti-rabbit  
240 (Jackson ImmunoResearch Labs Inc, West Grove, PA, USA), or anti-mouse (Jackson  
241 ImmunoResearch) secondary antibodies at a 1:2000 dilution. Finally, the membranes  
242 were rinsed in TBS/0.1% Tween-20 and exposed to Pierce™ ECL Western Blotting  
243 Substrate (Thermo Fischer Scientific) following the manufacturer's instructions.  
244 Emitted light was captured on Hyperfilm (Amersham-Pharmacia) and a densitometry  
245 analysis was performed by applying the Scion Image software (V. beta 4.0.2, Scion  
246 Image Corp., Frederick, MD, USA). Additionally, the expression of ACTB (1: 4:000;  
247 mouse anti- $\beta$ actin; Sigma-Aldrich) was used as an internal control to confirm equivalent  
248 total protein loading.

#### 249 **Dot Blot Analysis**

250 The CCSP protein expression was evaluated in lung homogenates after protein  
251 measurement was performed using a Bio-Rad kit. Samples were then adjusted to 5 $\mu$ g/ $\mu$ l  
252 in PBS, pH 7.4, and 10 $\mu$ l of each sample were spotted onto a Hybond C membrane  
253 (Amersham Pharmacia). Then, the membrane was blocked with 5% fat-free milk in  
254 PBS buffer for 1h and then incubated for 3h with a rabbit primary antibody anti-CC10  
255 1:500 (Santa Cruz Biotechnology) in blocking buffer at room temperature. After  
256 washing with TBS–Tween-20 buffer, the membrane was treated with a HRP-conjugated  
257 anti-rabbit antibody (Jackson ImmunoResearch) and the next handle was as described  
258 above for Western blot.

#### 259 **Cytokine detection by ELISA**

260 Cytokines production was measured, in BAL supernatant, following the manufacturer's  
261 instructions. It was applying commercially available sandwich ELISA kits for IL-4 (BD  
262 Biosciences), IL-12 and TSLP (Biolegend, San Diego, CA, USA), as well as TNF $\alpha$  and  
263 IFN $\gamma$  (eBioscience, San Diego, CA, USA).

#### 264 **RNA isolation and gene expression analysis**

265 Total RNA was extracted from right lung tissue samples (~0,01mg) with Trizol reagent.  
266 RNA was subsequently purified using Direct-zol RNA min prep kit (Zymo Research)  
267 following the manufacturer's instructions and quantified with a ND-1,000, NanoDrop  
268 spectrophotometer (Thermo Scientific) at 260 nm. Measurements of A260/280 were  
269 used to determine the purity of the RNA. After that, 1 $\mu$ g of RNA was used as template  
270 for reverse transcription following the manufacturer's instructions (EpiScript™ Reverse  
271 Transcriptase System kit, Epicentre, USA), using random hexamer primers (Fermentas,  
272 Thermo Fisher Scientific, MA, USA) and utilizing a My Cicle r™ BIO-RAD (Thermal  
273 Cycler System, CA, USA).

274 Real-Time PCR analysis was performed on an ABI Prism 7500 detection system  
275 (Applied Biosystem, CA, USA) using Power SYBR Green PCR Master Mix (Applied  
276 Biosystems, Thermo Fisher Scientific). Relative changes in gene expression were  
277 calculated using the 2- $\Delta\Delta$ Ct method normalized against the housekeeping gene 18s. For  
278 each pair of primers, a dissociation plot resulted in a single peak, indicating that only  
279 one cDNA species was amplified. Amplification efficiency for each pair of primers was  
280 calculated using standard curves generated by serial dilutions of cDNA. All primers  
281 were from Invitrogen (Buenos Aires, Argentina). The specific primers pairs used were:

282 TSLPfp: 5'-AGAGAAATGACGGTACTCAGG-3', TSLPrp: 5'-

283 TTCTGGAGATTGCATGAAGGA-3'; 18sfp 5'-ATGCGGCGGCGTTATTCC-3',

284 18srp: 5'-GCTATCAATCTGTCAATCCTGTCC-3'; CCSPfp: 5'-

285 GATCGCCATCACAATCACTG-3', CCSPrp: 5'-CTCTTGTGGGAGGGTATCCA-3';  
286 SP-Dfp: 5'-TGGACCCAAAGGAGAGAATG-3', SP-Drp: 5'-  
287 CATGCCAGGAGCACCTACTT-3'.

### 288 **Clinical score assessment of the degree of respiratory distress**

289 In three different protocols, at days 7-10 of the allergen challenge, the breathing patterns  
290 of mice (n=6/group) were video recording during the first minute after OVA instillation.  
291 The values assigned to increasing signs of respiratory distress resulted from the  
292 adaptation of the respiratory failure clinical score system developed by Wood (56). The  
293 scoring was performed, via a double-blind procedure, by three different physician  
294 operators and analyzed by a nonparametric statistical test (see below).

### 295 **Statistical analysis**

296 In general, data obtained were analyzed by one-way ANOVA, followed by post-hoc  
297 comparison with the Tukey-Kramer test. In particular, for the analysis of clinical score  
298 data, we applied the Kruskal Wallis test. For all test a  $p < 0.05$  significance level was  
299 used.

300

301

302

303

## 304 **RESULTS**

### 305 **Neonatal LPS stimulation inhibited OVA-induced allergic airways inflammation** 306 **triggered in the adulthood**

307         Firs, we evaluated the effect of an early exposition with LPS (represented in the  
308 LPSn/OVA group) over an ulterior OVA allergic response in the airway's analyzing  
309 BAL cytokines and cellular inflammatory content as well as the breathing pattern  
310 recorded in the different mice groups.

311         We detected that neonatal LPS treatment affected the development of  
312 experimental asthma triggered in adulthood. As shown in Fig.1, the establishment of  
313 experimental asthma in adult mice was largely prevented as indicated by a significantly  
314 lower influx of both total inflammatory cells and eosinophils into the airways lumen of  
315 LPSn/OVA mice compared to the PBSn/OVA group (Fig.1b). In addition, the number  
316 of macrophages remained unchanged while neutrophils increased significantly (Fig 1a).  
317 Surprisingly, IL-4 and TSLP, both associated to Th2 inflammation, exhibited normal  
318 levels in BAL of LPS pre-treated mice in spite of the allergen-challenge, while they  
319 were significant higher in PBSn/OVA group (Fig. 1c and 1d respectively). As expected,  
320 in the LPSn group neither BAL cell count nor IL-4 content were different from controls  
321 (Fig 1b and c); TSLP was remarkable reduced to non-detectable levels (Fig. 1d).

322         To test whether the inflammatory parameters were accompanied by changes in  
323 the degree of respiratory distress, a clinical scoring system was carried out (See  
324 Supplementary material). While most of the neonatal PBS-exposed mice displayed  
325 higher signs of respiratory distress after OVA challenge, the breathing pattern of  
326 LPSn/OVA mice was not different from control mice (Fig 1e).

327

### 328 **Neonatal LPS application promoted innate immunity mediators, antimicrobial** 329 **cytokines and Treg cells in the airway's microenvironment**

330         After demonstrating the abrogation of a Th2 inflammatory response, we  
331 investigated whether neonatal LPS exposure influences other components of the  
332 immune response. In the airway's milieu LPS stimulus increased inflammatory  
333 cytokines as TNF $\alpha$  and IL-12 in both LPSn and LPSn/OVA mice groups (Fig. 2c and  
334 2b, respectively). It was noteworthy that LPS induced high levels of IFN $\gamma$ , a  
335 prototypical Th1 cytokine, in the LPSn group but not in LPSn/OVA animals (Fig. 2a).

336 By contrast, the latter exhibited the higher influx of CD25<sup>+</sup>/FOXP3<sup>+</sup> Treg cells (48,16  
337 %  $\pm$  10,2 LPSn/OVA vs 19.65 %  $\pm$  4,22 PBSn/OVA) (Fig.2d). Furthermore,  
338 immunofluorescence performed in cytopins displayed an increased level of IL-10  
339 positive cells in LPSn/OVA group compared with PBSn animals, although the analysis  
340 of the IL-10<sup>+</sup>/CD4<sup>+</sup> cells ratio revealed a significant change in both group (LPSn and  
341 LPSn/OVA) compared to control. (Fig. 2e).

342

### 343 **Fig 2. Modulatory response of the airway's environment in BAL.**

344 a), b) and c) IFN $\gamma$ , IL-12 and TNF $\alpha$  levels by ELISA, respectively. d) Percentage of  
345 CD4<sup>+</sup>CD25<sup>+</sup>FOXP3<sup>+</sup> cells obtained in BAL by flow cytometry. The plots correspond  
346 to a representative experiment analysis in all groups, the % of CD25<sup>+</sup>FOXP3<sup>+</sup> cells  
347 are shown in the Q2 quadrant. e) Immunofluorescence count of CD4<sup>+</sup>, IL 10<sup>+</sup> and  
348 ratio of IL10<sup>+</sup>/CD4<sup>+</sup>cells performed in cytopsin. Data are represented as mean  $\pm$ SEM,  
349 \*p< 0.05 vs PBSn, \*\*p<0.01 vs PBSn, \*\*\*p<0.001vs PBSn.

350

351 We next characterized the epithelial response in this long-lasting anti-allergic  
352 modulation in order to evidence if the early LPS stimulus can trigger local epithelial  
353 mechanisms involved in prevention of asthma development in adulthood.

354

### 355 **Neonatal LPS exposure abrogated the development of mucous metaplasia and pro- 356 allergic mediators in the bronchiolar epithelium**

357 We first analyzed changes in the expression of specific pro-allergic mediators  
358 that are known to increase in bronchiolar epithelium during asthma,

359 As was shown before (55), the OVA-allergic inflammation incited mucous cell  
360 metaplasia in the bronchiolar Club cell via EGFR signaling. In this way, Figure 3 shows  
361 an increased number of mucous secreting cells (AB-PAS panel in Fig 3a and Fig. 3b) as  
362 well as the overexpression of phosphorylated-EGFR in the apical cytoplasm of CC in  
363 PBSn/OVA mice (pEGFR panel in Fig. 3a). Whereas in LPSn/OVA mice, both, pEGFR  
364 overexpression (pEGFR panel in Fig. 3a) and mucous metaplasia (Fig. 3b), were largely  
365 reduced by the neonatal endotoxin- treatment.

### 366 **Fig 3. Mucous metaplasia analysis in Club cells and epithelial TSLP expression.**

367 a) Representative photomicrographs of Alcian blue-periodic acid Schiff (AB-PAS),  
368 TSLP and pEGFR staining of bronchiolar sections. Scale bars: 20 $\mu$ m. In AB-PAS  
369 panel arrows indicate AB-PAS positive cells in PBSn/OVA and LPSn/OVA groups,  
370 while arrowheads indicate infiltrating inflammatory cells. In TSLP panel, arrows  
371 indicate positive cells in PBSn/OVA although some cells (arrowhead) from te



372 inflammatory response also expressed TSLP, inset selection demonstrated the lack of  
373 staining in club cells LPSn/OVA groups.. In pEGFR panel arrows indicate positive  
374 cells in PBSn/OVA, while the inset demonstrated the apical expression of the  
375 activated receptor in club cells. b) Graph represents AB-PAS cells count per 100 $\mu$ m.  
376 c) TSLP mRNA expression by Real-Time PCR analysis. Graph represents fold  
377 increase expression in lung tissue homogenate. Data are represented as mean  $\pm$ SEM,  
378 \*p<0.05 vs PBSn, \*\*\*p<0.001 vs PBSn, ### p<0.001 vs PBSn/OVA.

379 We also studied the effect of neonatal-LPS on the expression of TSLP, an  
380 epithelial cell cytokine that promotes Th2 differentiation after allergen contact. In  
381 accordance with the pEGFR and mucous metaplasia induction, bronchiolar epithelial  
382 cells of PBSn/OVA group, showed strong TSLP immunoreactivity in the apical  
383 cytoplasm; meanwhile CC of LPSn/OVA animals skipped of the overexpression of  
384 TSLP (TSLP panel in Fig 3a). These results were corroborated by the quantitative PCR  
385 analysis (Fig. 3c), showing that lung TSLP mRNA almost duplicated its expression in  
386 PBSn/OVA animals ( $1.85 \pm 0.09$  PBSn/OVA vs  $1 \pm 0.1$  PBSn) while remained  
387 unchanged in LPSn/OVA mice ( $1.12 \pm 0.19$ ).

388 In previous studies, we have demonstrated that the ultrastructure of CC is a  
389 sensitive parameter of the airways allergic inflammatory affection (Roth 2007, 2013,  
390 Garcia 2014). For this reason, we studied CC morphological profile in all groups by  
391 electron microscopy (Fig. 4). At this level, we corroborated the preservation of the  
392 typical cellular profile in PBSn mice, characterized by the presence of a dome-shape  
393 cupola, numerous polymorphic mitochondria in the cytoplasm, along with scarce  
394 spherical electron-dense secretory granules under the plasma membrane (Fig. 4a). These  
395 parameters could also be seen in LPSn/OVA mice, which differed only by an increase  
396 on the number of normal electron-dense granules as well as a mayor development of  
397 RER (Fig. 4d). Meanwhile, PBSn/OVA animals displayed characteristic mucous cell  
398 metaplasia featured as a hypertrophied cytoplasm filled up with numerous large  
399 electron-lucent secretory granules, slim mitochondria and abundant RER (Fig. 4b). In  
400 control mice, only exposed to LPS, CC also developed an increased number of electro-  
401 dense granules, as was shown by LPSn/OVA animals (Fig. 4c). In this group, the  
402 evident diminution of their CC cupola is probably due to the repeated LPS instillation  
403 they received in neonatal life.

#### 404 **Fig 4. Club cell ultrastructural features.**

405 Representative electron micrograph images of club Cell morphology of PBSn (a),  
406 PBSn/OVA (b), LPSn/OVA(c) and LPSn/OVA (d) groups are shown. Scale bar  
407 represents 5 $\mu$ m. Nu: nucleus, Mi: mitochondria, Ci: ciliated cells, Golgi: Golgi



408 apparatus, RER: rough endoplasmic reticulum. Arrowheads: normal electron dense  
409 granules, arrows: electron lucid granules.

410

411 **Neonatal LPS stimulus promoted a long-lasting increase of mediators of innate**  
412 **response and Th2-immunomodulatory proteins on bronchiolar epithelium**

413 Next, we analyzed whether the mucous metaplasia prevention by neonatal LPS  
414 treatment correlated with changes in the expression of epithelial host defense mediators,  
415 mainly CCSP and SP-D. As it was described (55), OVA-allergic inflammation induced  
416 a diminution in the immunoreactivity of CCSP and SP-D in CC of PBSn/OVA group  
417 when compared to its control group (CCSP and SP-D panels in Fig 5a). Meanwhile for  
418 both LPSn and LPSn/OVA groups, a strong CCSP and SP-D immunolabelling was  
419 observed (Fig 5a). These changes in protein expression of CCSP and SP-D were also  
420 verified by immunoblotting (Fig. 5b and 5c). However, the neonatal LPS-instillation  
421 did not increase mRNA expression of CCSP or SP-D in LPSn and LPSn/OVA (Fig. 5f  
422 and 5g, respectively). This may be due to the stimulus for protein secretion provided by  
423 the allergen challenge in LPS/OVA group, and to the contribution of SP-D of the Type  
424 II alveolar cells; which could explain the highest SP-D content by western blot analysis  
425 in these group.

426 Regarding the microbial recognition and cytokine response, both the toll like  
427 receptor 4 (TLR4) and TNF $\alpha$ , increased their expression in CC as well as in lung tissue  
428 of both LPS neonatal stimulated groups (Fig 5d and 5e, respectively). These suggest a  
429 specific LPS-response in bronchiolar epithelium that induced a persistent elevation of  
430 these defense molecules and seemed to be preserved in spite of allergen stimulus.

431 **Fig 5. Club cell's expression of host defense proteins and antimicrobial cytokines.**  
432 a) Immunostaining of CCSP, SP-D, TLR4 and TNF $\alpha$  performed on lung section of all  
433 groups. Positive cells appear in brown against the blue counter stain of haematoxylin.  
434 Scale bars: 20 $\mu$ m. b) Dot blot of CCSP in lung homogenates. Graph represents fold  
435 increase of the relative CCSP/ $\beta$ -actin expression in lung homogenate by densitometric  
436 analysis. c), d) and e) Western Blot of SP-D, TLR4 and TNF $\alpha$  lung content,  
437 respectively. Graph represents fold increase of the relative expression in lung  
438 homogenate by densitometric analysis. f) and g) CCSP and SP-D mRNA respectively  
439 expression by Real-Time PCR analysis. Graph represents fold increase expression in  
440 lung tissue homogenate. Data are represented as mean  $\pm$ SEM, \*p< 0.05 vs PBSn,  
441 \*\*p<0.01 vs PBSn, ● p<0.05 vs PBSn.

442

443

444

## 445 DISCUSSION

446 In the present work, we reported that neonatal LPS-treatment triggers anti-  
447 allergic secretory products of the local airway epithelium that persist in adulthood.  
448 Among these products, we demonstrated, the increase of CCSP and SP-D content,  
449 together with the upregulation of TLR-4 and TNF $\alpha$ , both related to innate host defenses,  
450 in epithelial CC and lung tissue. In correlation, CC skipped the mucous metaplasia  
451 pathway in front of airborne allergen challenge, preserving their typical phenotype and  
452 declining EGFR, mucins, and TSLP, a pro-Th2 cytokine, overexpression. Furthermore,  
453 under allergic stimulus, animals with neonatal LPS treatment exhibited normal  
454 breathing patterns, normal IL-4 and TSLP levels and a lower eosinophilia. By contrast,  
455 in those mice, an increase in phagocytes and in regulatory cells (CD4+CD25+FOXP3+  
456 and CD4+IL-10+), as well as in IL-12 and TNF $\alpha$  levels was observed. These evidences  
457 are remarkable considering that they reveal a possible new preventative and therapeutic  
458 approach to asthma focused on increasing the airways resistance to environmental  
459 insults rather than suppressing Th2 downstream inflammation once it is established. The  
460 finding of anti-allergic effects associated to CCSP and SP-D is consistent with previous  
461 results (19) (41, 49-51) (40, 48). For instance, there is evidence that these proteins down  
462 regulate the type 2 differentiation of Th cells, inhibits the allergen-activation of innate  
463 immune cells (eosinophils, basophils, and mast cells) and are reduced in both BAL and  
464 serum of asthmatic individuals (40, 41, 50, 51, 57) (47, 48, 58). Moreover, previous  
465 reports from our laboratory showed the interplay between the establishment of an  
466 experimental asthma model in mice and the diminution of CCSP and SP-D levels,  
467 which were restored by Budesonide or Montelukast treatment (52).

468 Recently, we determined that the pre-treatment of adult mice with LPS before an  
469 allergic inflammation partially prevented CCSP and SP-D reduction in CC, and the  
470 increase of IL-4 levels and airways hyperresponsiveness (55). However, in the present  
471 work we demonstrate that when endotoxin treatment is performed in neonatal life it  
472 achieved a more extensive asthma prevention in adulthood. The neonatal treatment not  
473 only avoided the metaplastic changes in these cells, but also preserved the mRNA levels  
474 of CCSP and SP-D; moreover, the characteristic increment of IL-4 and respiratory  
475 distress in front of OVA challenge were damped. These results are similar to the  
476 blunting of a Th-2 allergic response and airways hiperresponsiveness (AHR) reported

477 by other authors using either, infant or pregnant mice and microbial stimulus (16, 17,  
478 19) (13)

479 As expected, an increase in TNF $\alpha$  and IL-12 was observed in both groups exposed  
480 to LPS; nevertheless, a robust Th1 response was only seen in LPS exposure animals as  
481 indicated by the high IFN $\gamma$  levels meanwhile in LPSn/OVA the most important  
482 immunological change was the increased number of Treg found. In addition, whereas  
483 LPSn/OVA group was the only one that reached a significant number of CD4+IL10+  
484 cells, both groups (LPSn and LPSn/OVA) demonstrated a significant ratio of IL10+  
485 /CD4+ cells ex vivo versus PBSn animals. Although the experimental design of our  
486 study cannot explain the IL-12 elevation coexisting with a Treg response in LPSn/OVA  
487 group, other authors have related the persistent increment of IL-12 cytokine as a  
488 stimulus of phagocyte activity (59, 60).

489 Meanwhile studies conducted by Gerhold in adults Balb/c with systemic  
490 administration of an anti-IL-12 before LPS stimulus, demonstrated that the reduction of  
491 an ulterior allergic inflammation occurs in an IL-12 dependent way (17). Regarding the  
492 Treg response, Nguyen et al previously described that TSLP directly impairs the  
493 function of pulmonary Treg cells obtained of allergic asthma patients (61). This was  
494 indicated by a significant decrease in suppressive activity and IL-10 production  
495 compared to healthy control and non-allergic asthmatic counterparts, which were  
496 associated with the TSLP expressions levels in BAL. Therefore, it is probable that the  
497 diminution of TSLP induced by LPS-pretreatment in this study, had the additional effect  
498 of restoring Treg.

499 In accordance with our results, experimental studies conducted by other authors  
500 in neonatal Balb/c mice exposed to LPS and different models of sensitization and  
501 exposition to OVA, also evidenced the occurrence of a response involving the  
502 expression of IL-10 and IFN- $\gamma$  in the re-exposition to allergen (16) (19). Furthermore,  
503 Gerhold demonstrated that LPS, either in prenatal or postnatal stimulus, induces a  
504 persistent elevation in soluble factors such as CD14 and Lipopolysaccharide binding  
505 protein-LBP, as well as TLR4 mRNA expression in young mice (16). More recently,  
506 the gene expression levels of innate and adaptive immunity essential markers in white  
507 blood cells in farmers' children were assessed in the multinational and prospective  
508 epidemiological study PARSIFAL (62). This study compared farmers to non-farmers'  
509 essential markers expressions and the prevalence of asthma; the authors determinate an

510 enhanced expression of genes of the innate immunity such as IRAK-4 and RIPK1  
511 well as regulatory molecules such as IL-10, TGF-beta, SOCS4, and IRAK-2. (62).  
512 Although the correlation of Treg and host defense molecules described is similar to our  
513 results, our finding pointed to the epithelium involvement in this persistence immune  
514 response.

515 As was described before, several experimental and clinical studies established the  
516 correlation between LPS pre-exposure and asthma phenotype abrogation; our study  
517 attempted to dissect the changes of a pro-allergic cytokine secreted by the epithelium  
518 such as TSLP in this context. In this sense, our results demonstrated that LPS neonatal  
519 exposition correlated with the abrogation of TSLP expression in epithelium and in BAL.  
520 Therefore, meanwhile allergen-induced TLSP recruits dendritic cells that amplify the  
521 Th2 response and reduces Treg cells expansion (27). In the last decades, several  
522 neonatal and pregnancy animal models suggested that the transition from the quiescent  
523 Th2-polarized fetal immune phenotype towards the more active Th1-pattern of mature  
524 adaptive immunity was intrinsically slower in the atopic population, thus increasing the  
525 risk of an allergen priming response against environmental antigens. (21, 22, 63-68).  
526 Thus, it would be important to future evaluate whether this early proinflammatory  
527 stimulus by LPS could cooperate with the progression of this transition.

528 In our study, LPS diminished the TSLP mRNA basal expression consistent with its  
529 intrinsic capacity to counterbalance different pro- allergic action; thus blunted the  
530 subsequent overproduction of TSLP in front of OVA exposition. In a model of human  
531 bronchial epithelial cell line, Lin et al also demonstrated that LPS pre-treatment could  
532 reduce the induction of TSLP mRNA levels by a virus that causes neonatal respiratory  
533 disease (69). Interestingly, in this study the basal mRNA levels of different signaling  
534 proteins involved in the TSLP overproduction were downregulated only when a  
535 repeated LPS- preventive treatment were applied. In a process that, similar to ours  
536 results, the authors attributed to the modulation in the expression of innate immunity  
537 signaling molecules of the airway epithelial cells to mitigate the allergic response.

538 The main contribution of our study is highlighting the involvement of  
539 bronchioalveolar epithelium in this early microbial protection from allergic disorder, a  
540 topic that remains unaddressed. This was demonstrated by the stable changes in the  
541 expression of antiallergic proteins as well as host defense factors by CC and the  
542 reduction to basal levels of potent epithelial-Th2 mediators, all of which was promoted

543 by neonatal LPS-stimulation that further polarized Treg response in front of allergen  
544 exposition. Altogether, our results point to several anti-allergic dynamic mechanisms  
545 overlying in the epithelium that could be favored in an adequate epidemiological  
546 environment.

## 547 REFERENCES

- 548 1. "Global strategy for asthma management and prevention: GINA executive summary."  
549 E.D. Bateman, S.S. Hurd, P.J. Barnes, J. Bousquet, J.M. Drazen, J.M. FitzGerald, P. Gibson, K.  
550 Ohta, P. O'Byrne, S.E. Pedersen, E. Pizzichini, S.D. Sullivan, S.E. Wenzel and H.J. Zar. *Eur Respir J*  
551 2008; 31: 143-178. *Eur Respir J*. 2018;51(2).
- 552 2. Bateman ED, Hurd SS, Barnes PJ, Bousquet J, Drazen JM, FitzGerald JM, et al. Global  
553 strategy for asthma management and prevention: GINA executive summary. *Eur Respir J*.  
554 2008;31(1):143-78.
- 555 3. Galli SJ, Tsai M, Piliponsky AM. The development of allergic inflammation. *Nature*.  
556 2008;454(7203):445-54.
- 557 4. Martinez FD. New insights into the natural history of asthma: primary prevention on  
558 the horizon. *J Allergy Clin Immunol*. 2011;128(5):939-45.
- 559 5. Jackson DJ, Hartert TV, Martinez FD, Weiss ST, Fahy JV. Asthma: NHLBI Workshop on  
560 the Primary Prevention of Chronic Lung Diseases. *Ann Am Thorac Soc*. 2014;11 Suppl 3:S139-  
561 45.
- 562 6. Mortality GBD, Causes of Death C. Global, regional, and national age-sex specific all-  
563 cause and cause-specific mortality for 240 causes of death, 1990-2013: a systematic analysis  
564 for the Global Burden of Disease Study 2013. *Lancet*. 2015;385(9963):117-71.
- 565 7. Strachan DP, Taylor EM, Carpenter RG. Family structure, neonatal infection, and hay  
566 fever in adolescence. *Arch Dis Child*. 1996;74(5):422-6.
- 567 8. Ege MJ, Herzum I, Buchele G, Krauss-Etschmann S, Lauener RP, Roponen M, et al.  
568 Prenatal exposure to a farm environment modifies atopic sensitization at birth. *J Allergy Clin*  
569 *Immunol*. 2008;122(2):407-12, 12 e1-4.
- 570 9. Macaubas C, de Klerk NH, Holt BJ, Wee C, Kendall G, Firth M, et al. Association  
571 between antenatal cytokine production and the development of atopy and asthma at age 6  
572 years. *Lancet*. 2003;362(9391):1192-7.
- 573 10. von Mutius E, Braun-Fahrlander C, Schierl R, Riedler J, Ehlermann S, Maisch S, et al.  
574 Exposure to endotoxin or other bacterial components might protect against the development  
575 of atopy. *Clin Exp Allergy*. 2000;30(9):1230-4.
- 576 11. Braun-Fahrlander C. Environmental exposure to endotoxin and other microbial  
577 products and the decreased risk of childhood atopy: evaluating developments since April 2002.  
578 *Curr Opin Allergy Clin Immunol*. 2003;3(5):325-9.
- 579 12. Pfefferle PI, Sel S, Ege MJ, Buchele G, Blumer N, Krauss-Etschmann S, et al. Cord blood  
580 allergen-specific IgE is associated with reduced IFN-gamma production by cord blood cells: the  
581 Protection against Allergy-Study in Rural Environments (PASTURE) Study. *J Allergy Clin*  
582 *Immunol*. 2008;122(4):711-6.
- 583 13. Polte T, Hennig C, Hansen G. Allergy prevention starts before conception: maternofetal  
584 transfer of tolerance protects against the development of asthma. *J Allergy Clin Immunol*.  
585 2008;122(5):1022-30 e5.
- 586 14. Gerhold K, Blumchen K, Bock A, Franke A, Avagjan A, Hamelmann E. Endotoxins and  
587 allergy: lessons from the murine model. *Pathobiology*. 2002;70(5):255-9.
- 588 15. Gerhold K, Avagyan A, Reichert E, Blumchen K, Wahn U, Hamelmann E.  
589 Lipopolysaccharides modulate allergen-specific immune regulation in a murine model of  
590 mucosal tolerance induction. *Int Arch Allergy Immunol*. 2008;147(1):25-34.

- 591 16. Gerhold K, Avagyan A, Seib C, Frei R, Steinle J, Ahrens B, et al. Prenatal initiation of  
592 endotoxin airway exposure prevents subsequent allergen-induced sensitization and airway  
593 inflammation in mice. *J Allergy Clin Immunol.* 2006;118(3):666-73.
- 594 17. Gerhold K, Bluemchen K, Franke A, Stock P, Hamelmann E. Exposure to endotoxin and  
595 allergen in early life and its effect on allergen sensitization in mice. *J Allergy Clin Immunol.*  
596 2003;112(2):389-96.
- 597 18. Blumer N, Herz U, Wegmann M, Renz H. Prenatal lipopolysaccharide-exposure  
598 prevents allergic sensitization and airway inflammation, but not airway responsiveness in a  
599 murine model of experimental asthma. *Clin Exp Allergy.* 2005;35(3):397-402.
- 600 19. Wang Y, McCusker C. Neonatal exposure with LPS and/or allergen prevents  
601 experimental allergic airways disease: development of tolerance using environmental antigens.  
602 *J Allergy Clin Immunol.* 2006;118(1):143-51.
- 603 20. Conrad ML, Ferstl R, Teich R, Brand S, Blumer N, Yildirim AO, et al. Maternal TLR  
604 signaling is required for prenatal asthma protection by the nonpathogenic microbe  
605 *Acinetobacter lwoffii* F78. *J Exp Med.* 2009;206(13):2869-77.
- 606 21. Holt PG, Strickland DH. Soothing signals: transplacental transmission of resistance to  
607 asthma and allergy. *J Exp Med.* 2009;206(13):2861-4.
- 608 22. Hawrylowicz C, Ryanna K. Asthma and allergy: the early beginnings. *Nat Med.*  
609 2010;16(3):274-5.
- 610 23. Schleimer RP, Kato A, Kern R, Kuperman D, Avila PC. Epithelium: at the interface of  
611 innate and adaptive immune responses. *J Allergy Clin Immunol.* 2007;120(6):1279-84.
- 612 24. Whitsett JA, Alenghat T. Respiratory epithelial cells orchestrate pulmonary innate  
613 immunity. *Nat Immunol.* 2015;16(1):27-35.
- 614 25. Rohmann K, Tschernig T, Pabst R, Goldmann T, Dromann D. Innate immunity in the  
615 human lung: pathogen recognition and lung disease. *Cell Tissue Res.* 2011;343(1):167-74.
- 616 26. Gripar SC, Richardson WM, Sodhi CP, Hackam DJ. No longer an innocent bystander:  
617 epithelial toll-like receptor signaling in the development of mucosal inflammation. *Mol Med.*  
618 2008;14(9-10):645-59.
- 619 27. West EE, Kashyap M, Leonard WJ. TSLP: A Key Regulator of Asthma Pathogenesis. *Drug*  
620 *Discov Today Dis Mech.* 2012;9(3-4).
- 621 28. Zhou B, Headley MB, Aye T, Tocker J, Comeau MR, Ziegler SF. Reversal of thymic  
622 stromal lymphopoietin-induced airway inflammation through inhibition of Th2 responses. *J*  
623 *Immunol.* 2008;181(9):6557-62.
- 624 29. Lambrecht BN, Hammad H. The airway epithelium in asthma. *Nat Med.*  
625 2012;18(5):684-92.
- 626 30. Plantinga M, Hammad H, Lambrecht BN. Origin and functional specializations of DC  
627 subsets in the lung. *Eur J Immunol.* 2010;40(8):2112-8.
- 628 31. Holgate ST. The airway epithelium is central to the pathogenesis of asthma. *Allergol*  
629 *Int.* 2008;57(1):1-10.
- 630 32. Holgate ST. The sentinel role of the airway epithelium in asthma pathogenesis.  
631 *Immunol Rev.* 2011;242(1):205-19.
- 632 33. Holgate ST, Arshad HS, Roberts GC, Howarth PH, Thurner P, Davies DE. A new look at  
633 the pathogenesis of asthma. *Clin Sci (Lond).* 2009;118(7):439-50.
- 634 34. Freishtat RJ, Watson AM, Benton AS, Iqbal SF, Pillai DK, Rose MC, et al. Asthmatic  
635 airway epithelium is intrinsically inflammatory and mitotically dyssynchronous. *Am J Respir Cell*  
636 *Mol Biol.* 2011;44(6):863-9.
- 637 35. Tompkins DH, Besnard V, Lange AW, Wert SE, Keiser AR, Smith AN, et al. Sox2 is  
638 required for maintenance and differentiation of bronchiolar Clara, ciliated, and goblet cells.  
639 *PLoS One.* 2009;4(12):e8248.
- 640 36. Reynolds SD, Malkinson AM. Clara cell: progenitor for the bronchiolar epithelium. *Int J*  
641 *Biochem Cell Biol.* 2010;42(1):1-4.



- 642 37. Mukherjee AB, Zhang Z, Chilton BS. Uteroglobin: a steroid-inducible  
643 immunomodulatory protein that founded the Secretoglobin superfamily. *Endocr Rev.*  
644 2007;28(7):707-25.
- 645 38. Maldonado CA, Sundblad V, Salatino M, Elia J, Garcia LN, Leimgruber C, et al. Cell-type  
646 specific regulation of galectin-3 expression by glucocorticoids in lung Clara cells and  
647 macrophages. *Histol Histopathol.* 2011;26(6):747-59.
- 648 39. Ray MK, Wang G, Barrish J, Finegold MJ, DeMayo FJ. Immunohistochemical localization  
649 of mouse Clara cell 10-KD protein using antibodies raised against the recombinant protein. *J*  
650 *Histochem Cytochem.* 1996;44(8):919-27.
- 651 40. Ray R, Zhang Z, Lee YC, Gao JL, Mukherjee AB. Uteroglobin suppresses allergen-  
652 induced TH2 differentiation by down-regulating the expression of serum amyloid A and SOCS-3  
653 genes. *FEBS Lett.* 2006;580(25):6022-6.
- 654 41. Johansson S, Andersson K, Wennergren G, Wenneras C, Rudin A. CC16 inhibits the  
655 migration of eosinophils towards the formyl peptide fMLF but not towards PGD<sub>2</sub>.  
656 *Inflammation.* 2009;32(2):65-9.
- 657 42. Voorhout WF, Veenendaal T, Kuroki Y, Ogasawara Y, van Golde LM, Geuze HJ.  
658 Immunocytochemical localization of surfactant protein D (SP-D) in type II cells, Clara cells, and  
659 alveolar macrophages of rat lung. *J Histochem Cytochem.* 1992;40(10):1589-97.
- 660 43. Wong CJ, Akiyama J, Allen L, Hawgood S. Localization and developmental expression of  
661 surfactant proteins D and A in the respiratory tract of the mouse. *Pediatr Res.* 1996;39(6):930-  
662 7.
- 663 44. Kuperman DA, Huang X, Nguyenvu L, Holscher C, Brombacher F, Erle DJ. IL-4 receptor  
664 signaling in Clara cells is required for allergen-induced mucus production. *J Immunol.*  
665 2005;175(6):3746-52.
- 666 45. Evans CM, Kim K, Tuvim MJ, Dickey BF. Mucus hypersecretion in asthma: causes and  
667 effects. *Curr Opin Pulm Med.* 2009;15(1):4-11.
- 668 46. Sonar SS, Ehmke M, Marsh LM, Dietze J, Dudda JC, Conrad ML, et al. Clara cells drive  
669 eosinophil accumulation in allergic asthma. *Eur Respir J.* 2012;39(2):429-38.
- 670 47. Shijubo N, Itoh Y, Yamaguchi T, Sugaya F, Hirasawa M, Yamada T, et al. Serum levels of  
671 Clara cell 10-kDa protein are decreased in patients with asthma. *Lung.* 1999;177(1):45-52.
- 672 48. Schaub B, Westlake RM, He H, Arestides R, Haley KJ, Campo M, et al. Surfactant  
673 protein D deficiency influences allergic immune responses. *Clin Exp Allergy.* 2004;34(12):1819-  
674 26.
- 675 49. Hung CH, Chen LC, Zhang Z, Chowdhury B, Lee WL, Plunkett B, et al. Regulation of TH2  
676 responses by the pulmonary Clara cell secretory 10-kd protein. *J Allergy Clin Immunol.*  
677 2004;114(3):664-70.
- 678 50. Johansson S, Wennergren G, Aberg N, Rudin A. Clara cell 16-kd protein downregulates  
679 T(H)2 differentiation of human naive neonatal T cells. *J Allergy Clin Immunol.* 2007;120(2):308-  
680 14.
- 681 51. Hartl D, Griese M. Surfactant protein D in human lung diseases. *Eur J Clin Invest.*  
682 2006;36(6):423-35.
- 683 52. Roth FD, Quintar AA, Uribe Echevarria EM, Torres AI, Aoki A, Maldonado CA.  
684 Budesonide effects on Clara cell under normal and allergic inflammatory condition. *Histochem*  
685 *Cell Biol.* 2007;127(1):55-68.
- 686 53. Elizur A, Adair-Kirk TL, Kelley DG, Griffin GL, deMello DE, Senior RM. Clara cells impact  
687 the pulmonary innate immune response to LPS. *Am J Physiol Lung Cell Mol Physiol.*  
688 2007;293(2):L383-92.
- 689 54. Snyder JC, Reynolds SD, Hollingsworth JW, Li Z, Kaminski N, Stripp BR. Clara cells  
690 attenuate the inflammatory response through regulation of macrophage behavior. *Am J Respir*  
691 *Cell Mol Biol.* 2010;42(2):161-71.

- 692 55. Garcia LN, Leimgruber C, Uribe Echevarria EM, Acosta PL, Brahamian JM, Polack FP, et  
693 al. Protective phenotypes of club cells and alveolar macrophages are favored as part of  
694 endotoxin-mediated prevention of asthma. *Exp Biol Med* (Maywood). 2015;240(7):904-16.  
695 56. Thaweerujitrot C, Daengsuwan T. Comparison between pediatric respiratory  
696 assessment measure (PRAM) score and Wood's asthma score to assess acute asthma  
697 exacerbation. *Asian Pac J Allergy Immunol*. 2019;37(3):123-9.  
698 57. Gardai SJ, Xiao YQ, Dickinson M, Nick JA, Voelker DR, Greene KE, et al. By binding  
699 SIRPalpha or calreticulin/CD91, lung collectins act as dual function surveillance molecules to  
700 suppress or enhance inflammation. *Cell*. 2003;115(1):13-23.  
701 58. Wang JY, Shieh CC, Yu CK, Lei HY. Allergen-induced bronchial inflammation is  
702 associated with decreased levels of surfactant proteins A and D in a murine model of asthma.  
703 *Clin Exp Allergy*. 2001;31(4):652-62.  
704 59. Basso B, Cervetta L, Moretti E, Carlier Y, Truyens C. Acute *Trypanosoma cruzi* infection:  
705 IL-12, IL-18, TNF, sTNFR and NO in *T. rangeli*-vaccinated mice. *Vaccine*. 2004;22(15-16):1868-  
706 72.  
707 60. Yang R, Yao L, Shen L, Sha W, Modlin RL, Shen H, et al. IL-12 Expands and Differentiates  
708 Human Vgamma2Vdelta2 T Effector Cells Producing Antimicrobial Cytokines and Inhibiting  
709 Intracellular Mycobacterial Growth. *Front Immunol*. 2019;10:913.  
710 61. Nguyen KD, Vanichsarn C, Nadeau KC. TSLP directly impairs pulmonary Treg function:  
711 association with aberrant tolerogenic immunity in asthmatic airway. *Allergy Asthma Clin*  
712 *Immunol*. 2010;6(1):4.  
713 62. Frei R, Roduit C, Bieli C, Loeliger S, Waser M, Scheynius A, et al. Expression of genes  
714 related to anti-inflammatory pathways are modified among farmers' children. *PLoS One*.  
715 2014;9(3):e91097.  
716 63. Holt PG, Jones CA. The development of the immune system during pregnancy and  
717 early life. *Allergy*. 2000;55(8):688-97.  
718 64. Renz H, Mutius E, Illi S, Wolkers F, Hirsch T, Weiland SK. T(H)1/T(H)2 immune response  
719 profiles differ between atopic children in eastern and western Germany. *J Allergy Clin*  
720 *Immunol*. 2002;109(2):338-42.  
721 65. Reece P, Thanendran A, Crawford L, Tulic MK, Thabane L, Prescott SL, et al. Maternal  
722 allergy modulates cord blood hematopoietic progenitor Toll-like receptor expression and  
723 function. *J Allergy Clin Immunol*. 2011;127(2):447-53.  
724 66. Hrdy J, Zanvit P, Novotna O, Kocourkova I, Zizka J, Prokesova L. Cytokine expression in  
725 cord blood cells of children of healthy and allergic mothers. *Folia Microbiol (Praha)*.  
726 2010;55(5):515-9.  
727 67. Holt PG. Primary allergic sensitization to environmental antigens: perinatal T cell  
728 priming as a determinant of responder phenotype in adulthood. *J Exp Med*. 1996;183(4):1297-  
729 301.  
730 68. Robinson M, McConnell MJ, Le Gros G. How epigenetic imprinting contributes to  
731 stabilizing the Th2 phenotype. *Immunol Cell Biol*. 2012;90(10):917-8.  
732 69. Lin TH, Cheng CC, Su HH, Huang NC, Chen JJ, Kang HY, et al. Lipopolysaccharide  
733 Attenuates Induction of Proallergic Cytokines, Thymic Stromal Lymphopoietin, and Interleukin  
734 33 in Respiratory Epithelial Cells Stimulated with PolyI:C and Human Parainfluenza Virus.  
735 *Front Immunol*. 2016;7:440.

736



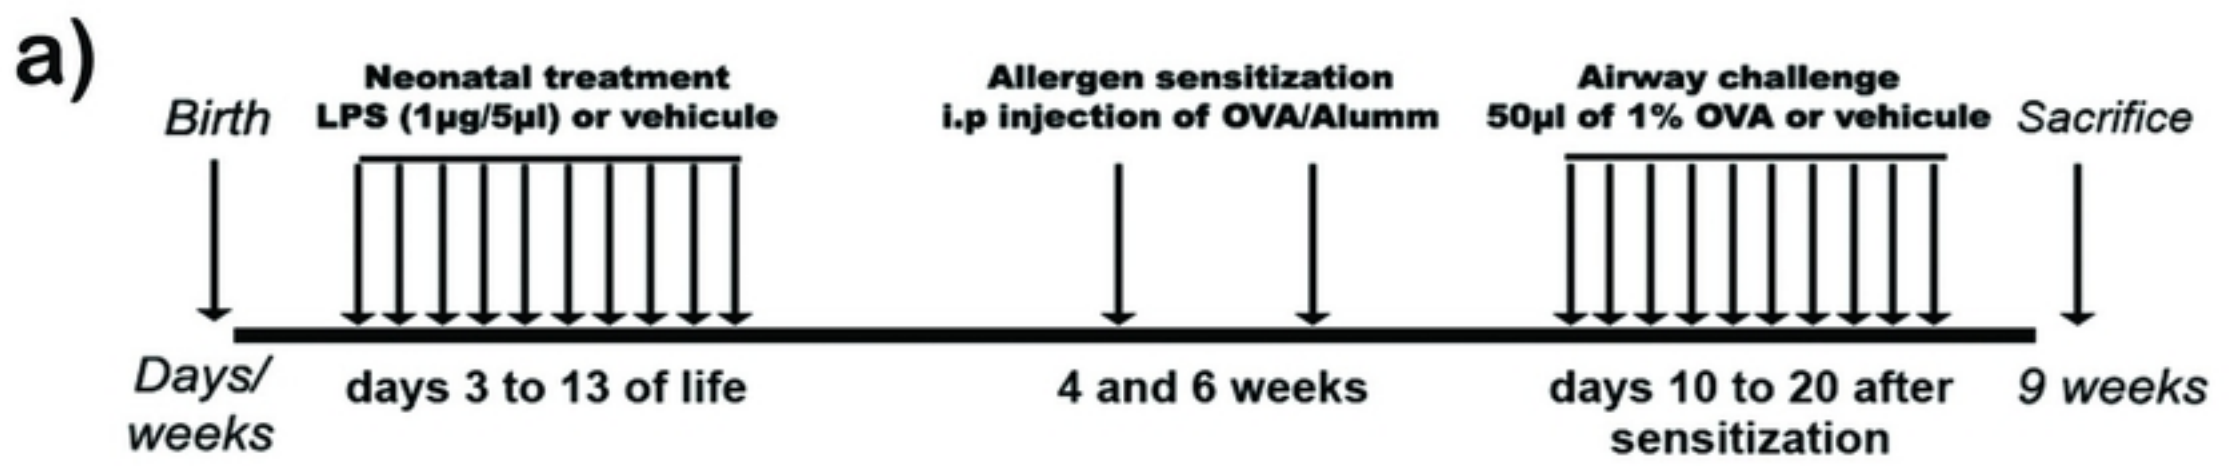

| Group    | Neonatal treatment | Allergen sensitization | Airway challenge |
|----------|--------------------|------------------------|------------------|
| PBSn     | PBS                | OVA                    | Saline           |
| LPSn     | LPS                | OVA                    | Saline           |
| PBSn/OVA | PBS                | OVA                    | OVA              |
| LPSn/OVA | LPS                | OVA                    | OVA              |

bioRxiv preprint doi: <https://doi.org/10.1101/854604>; this version posted November 25, 2019. The copyright holder for this preprint (which was not certified by peer review) is the author/funder, who has granted bioRxiv a license to display the preprint in perpetuity. It is made available under aCC-BY 4.0 International license.

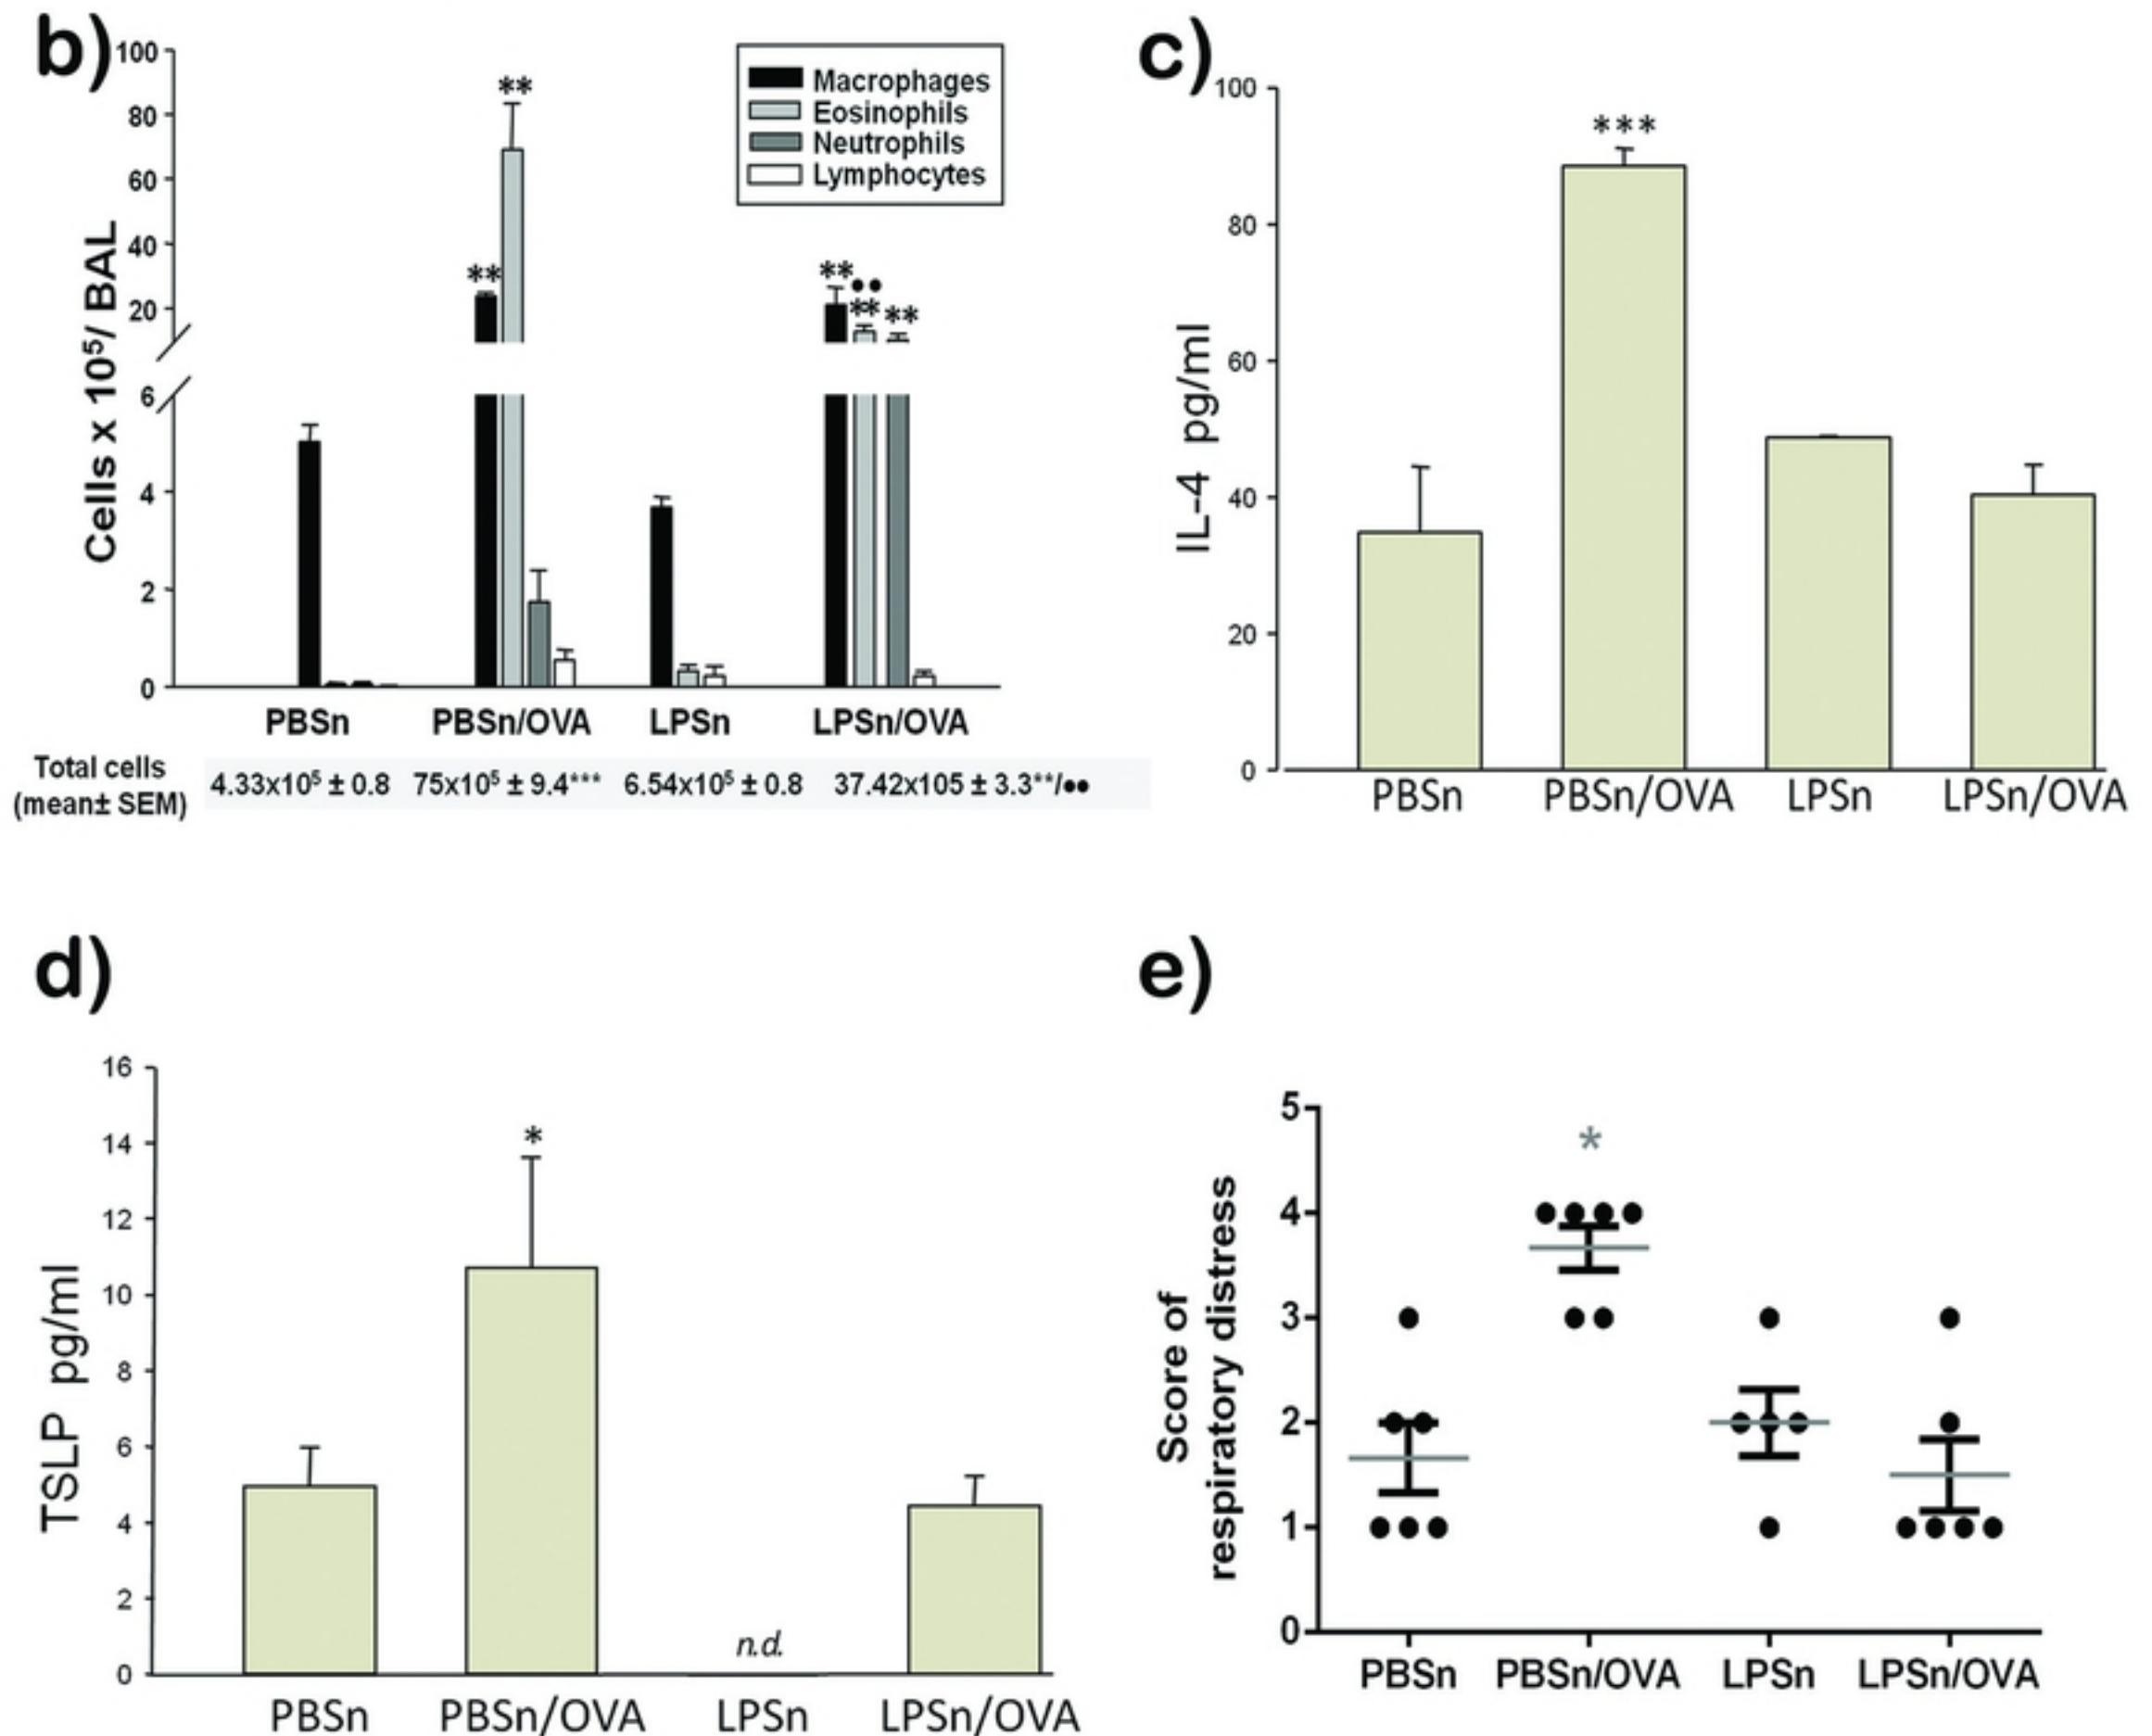

Figure 1

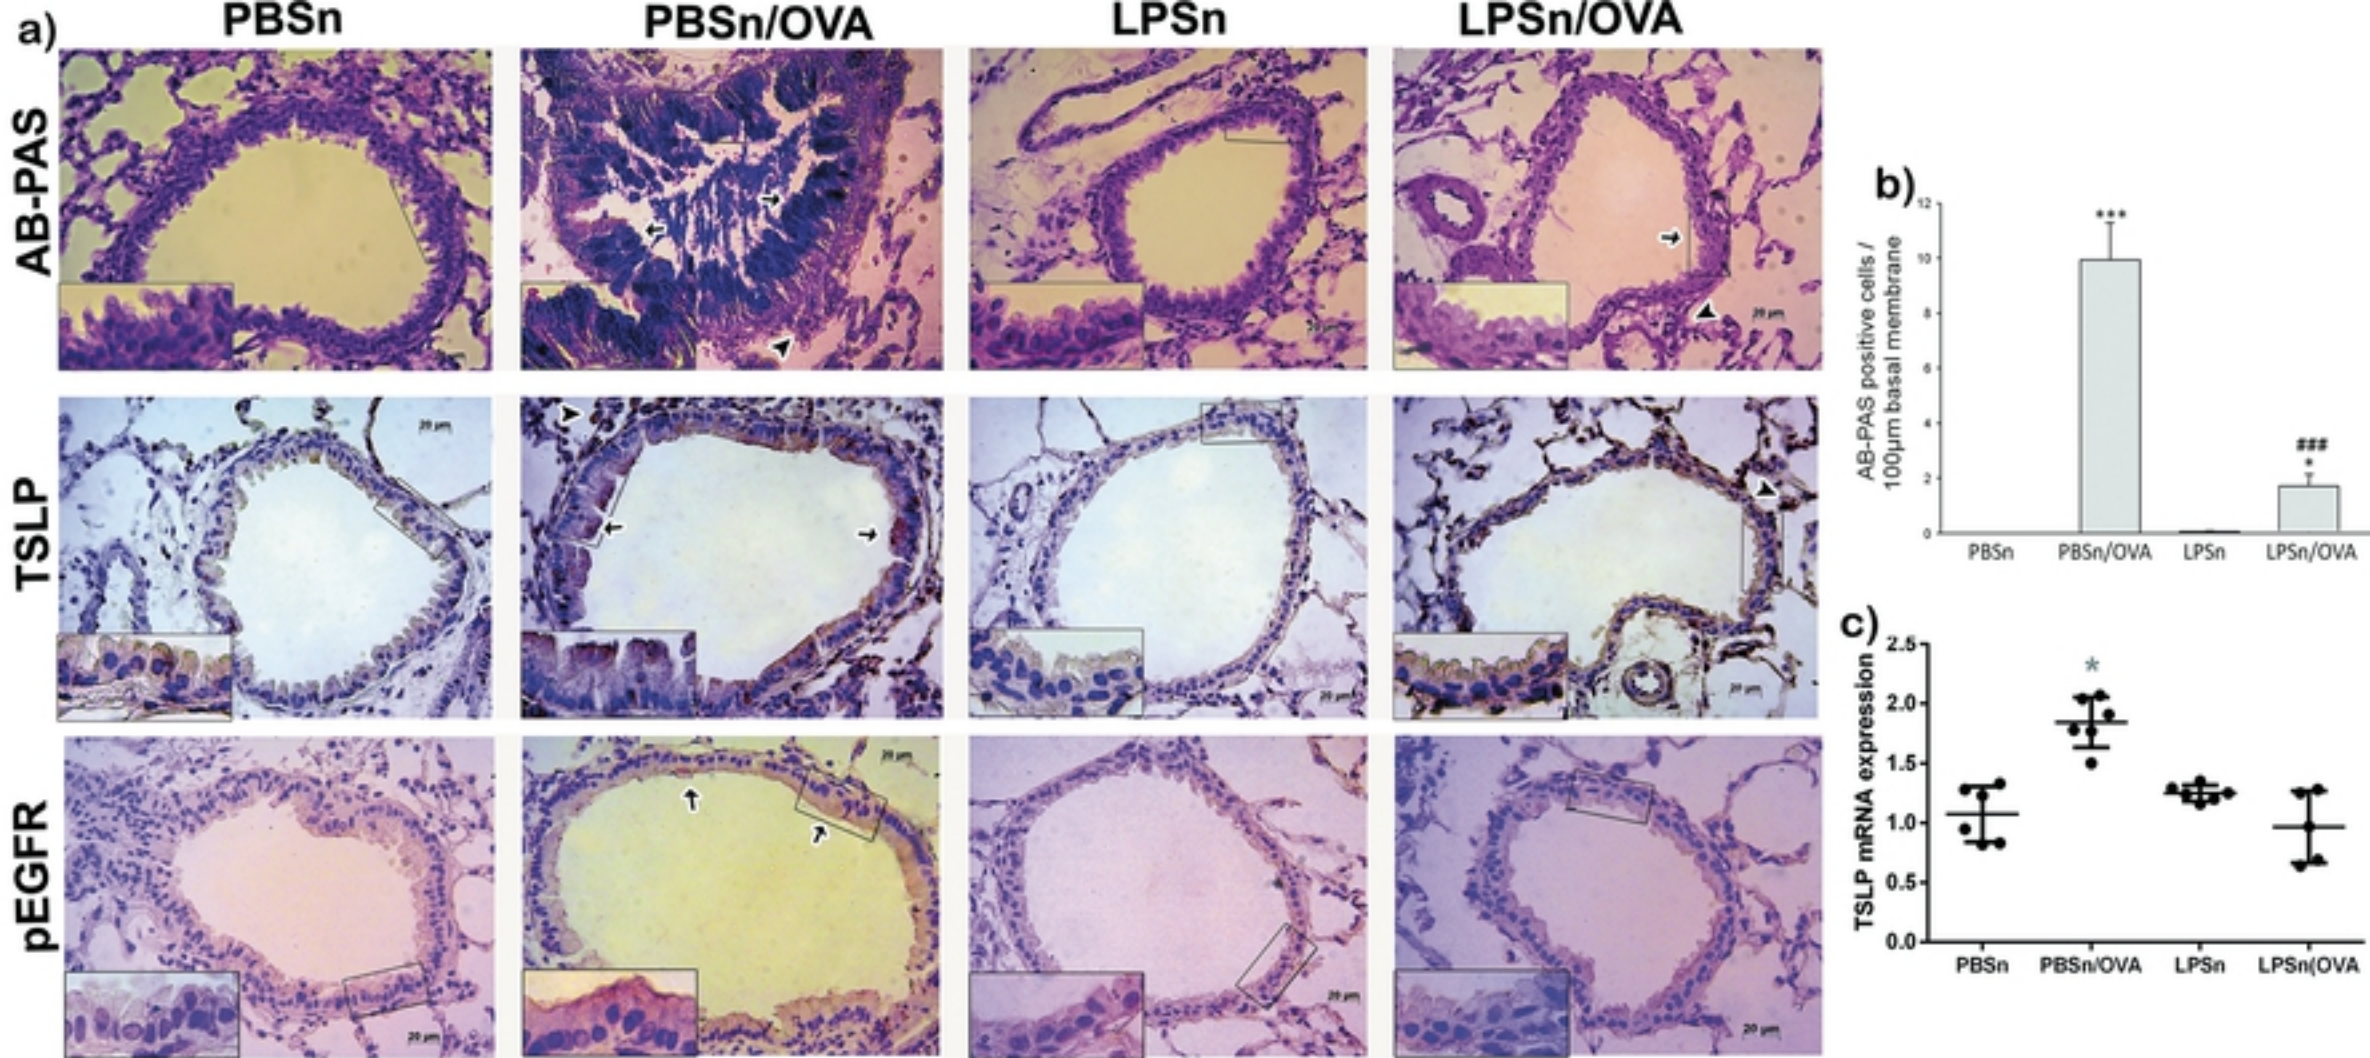

Figure 3



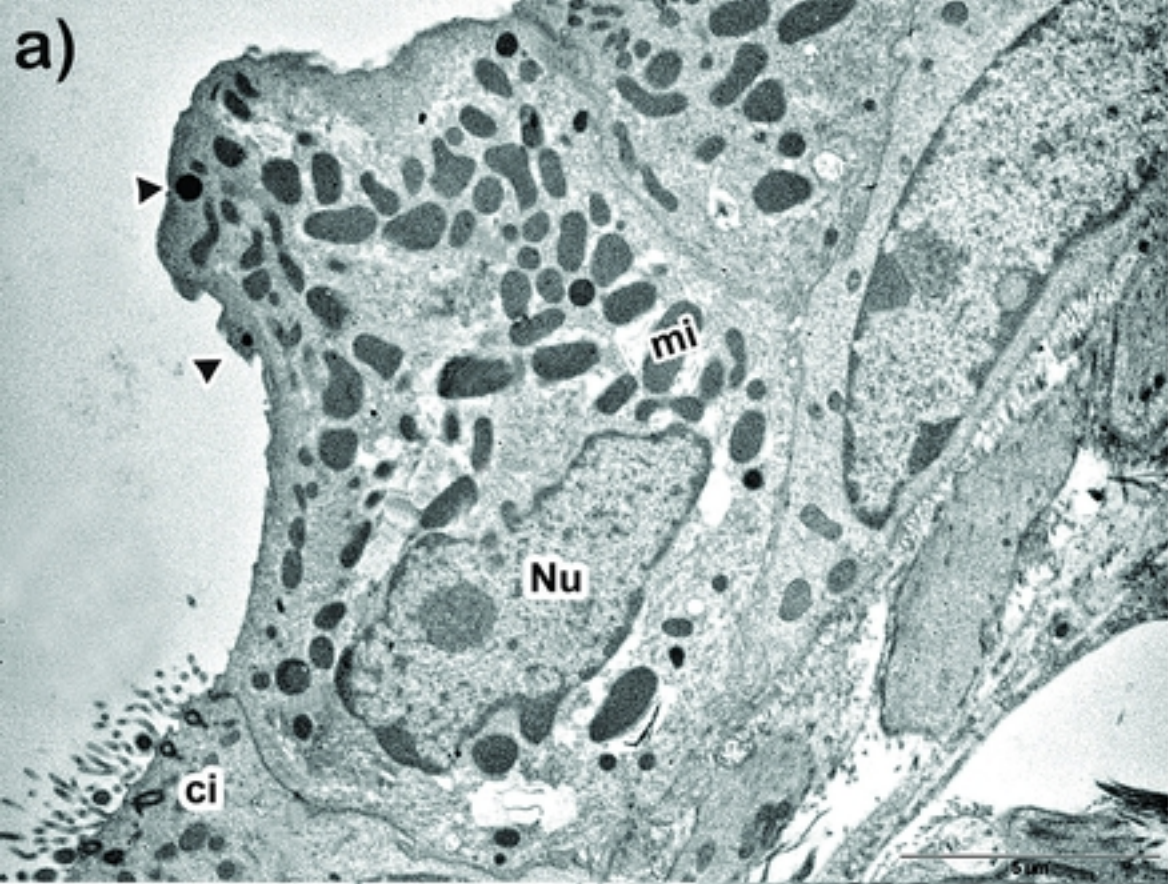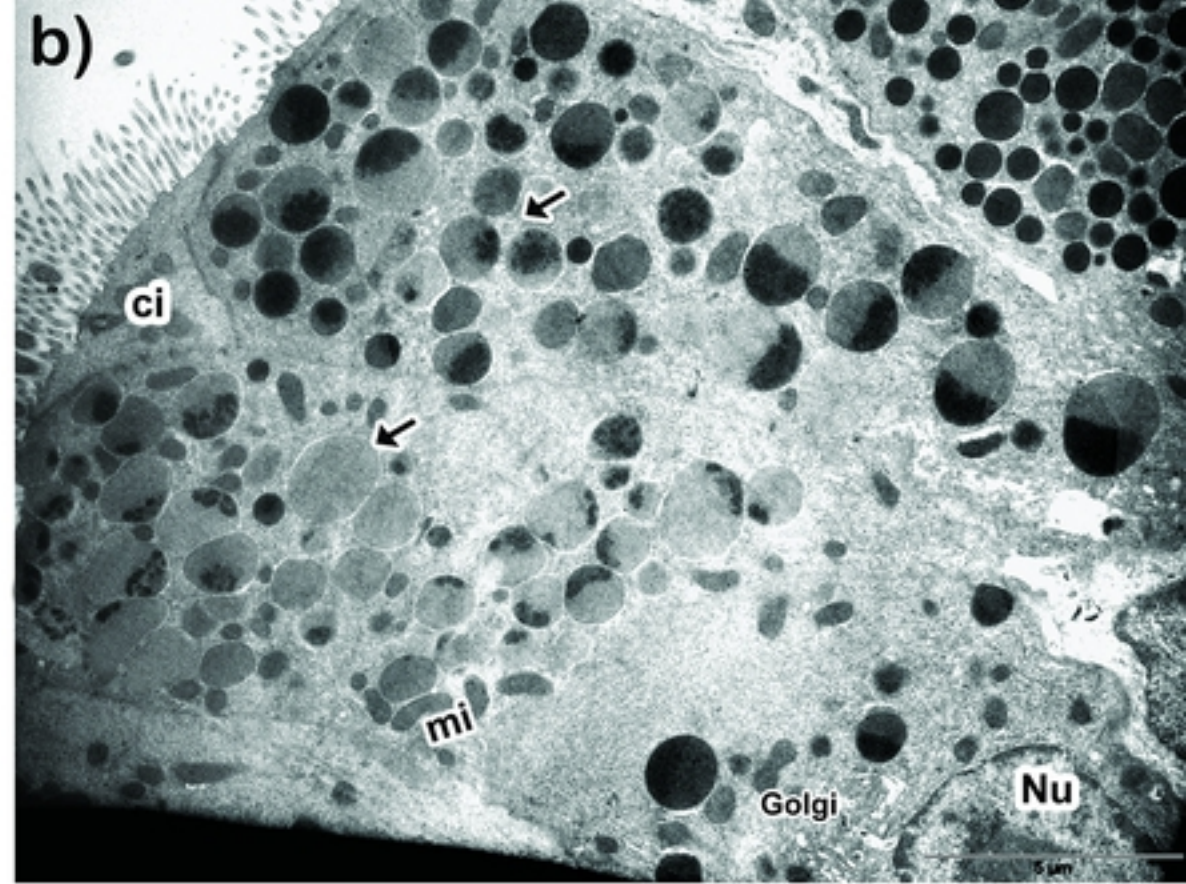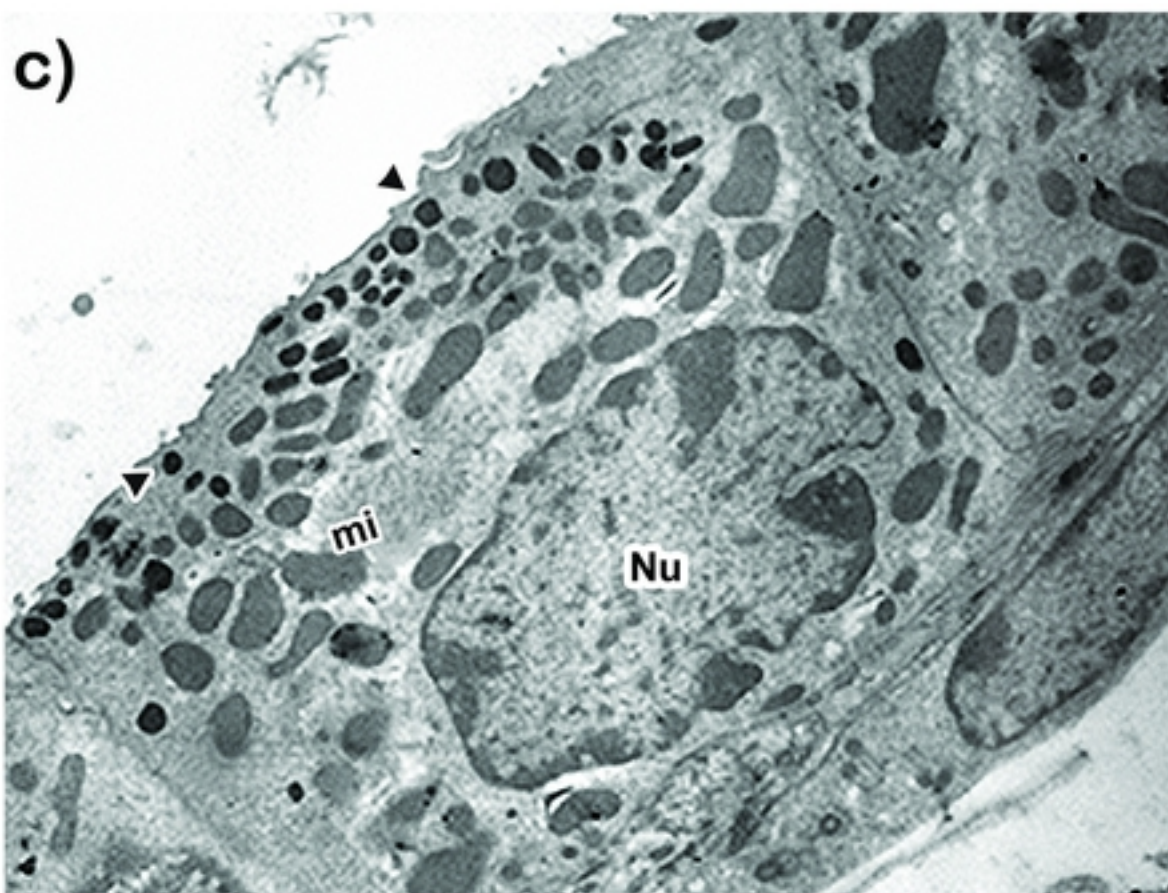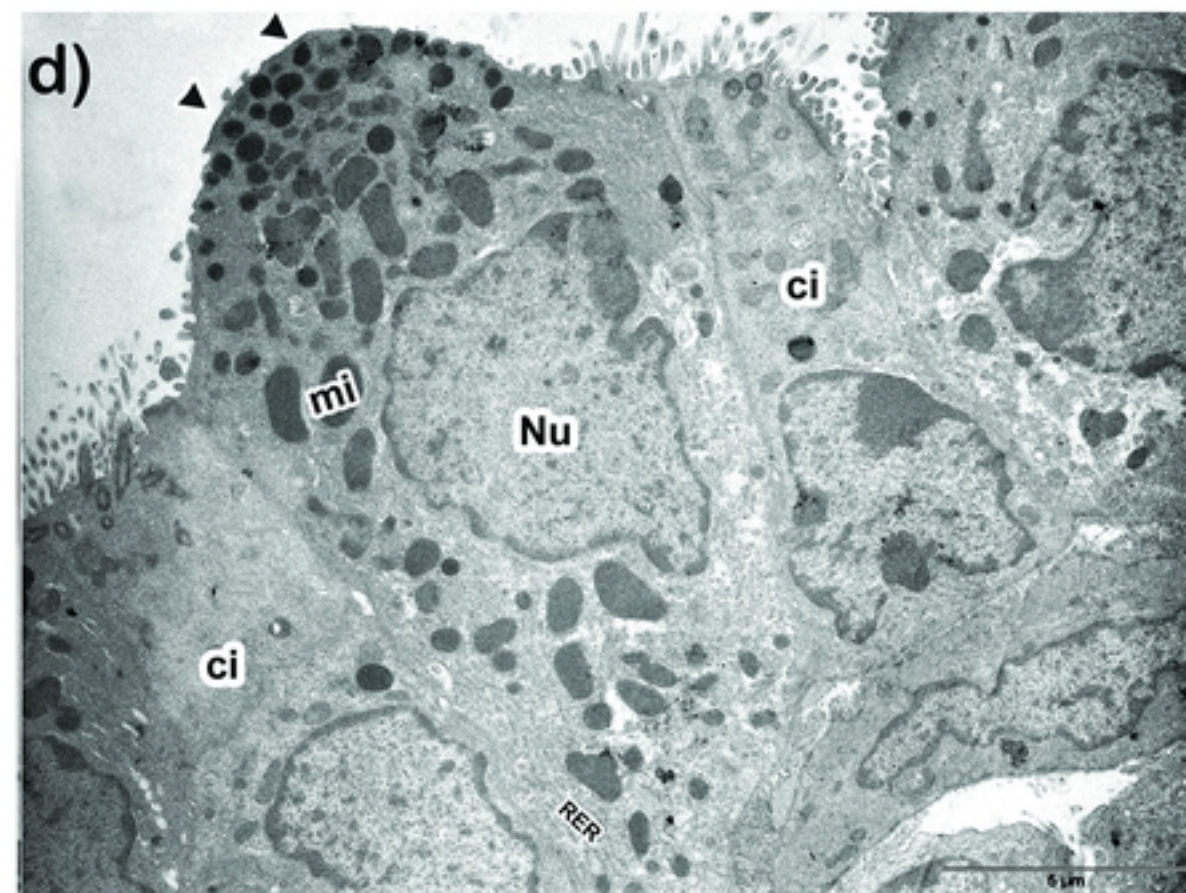

Figure 4



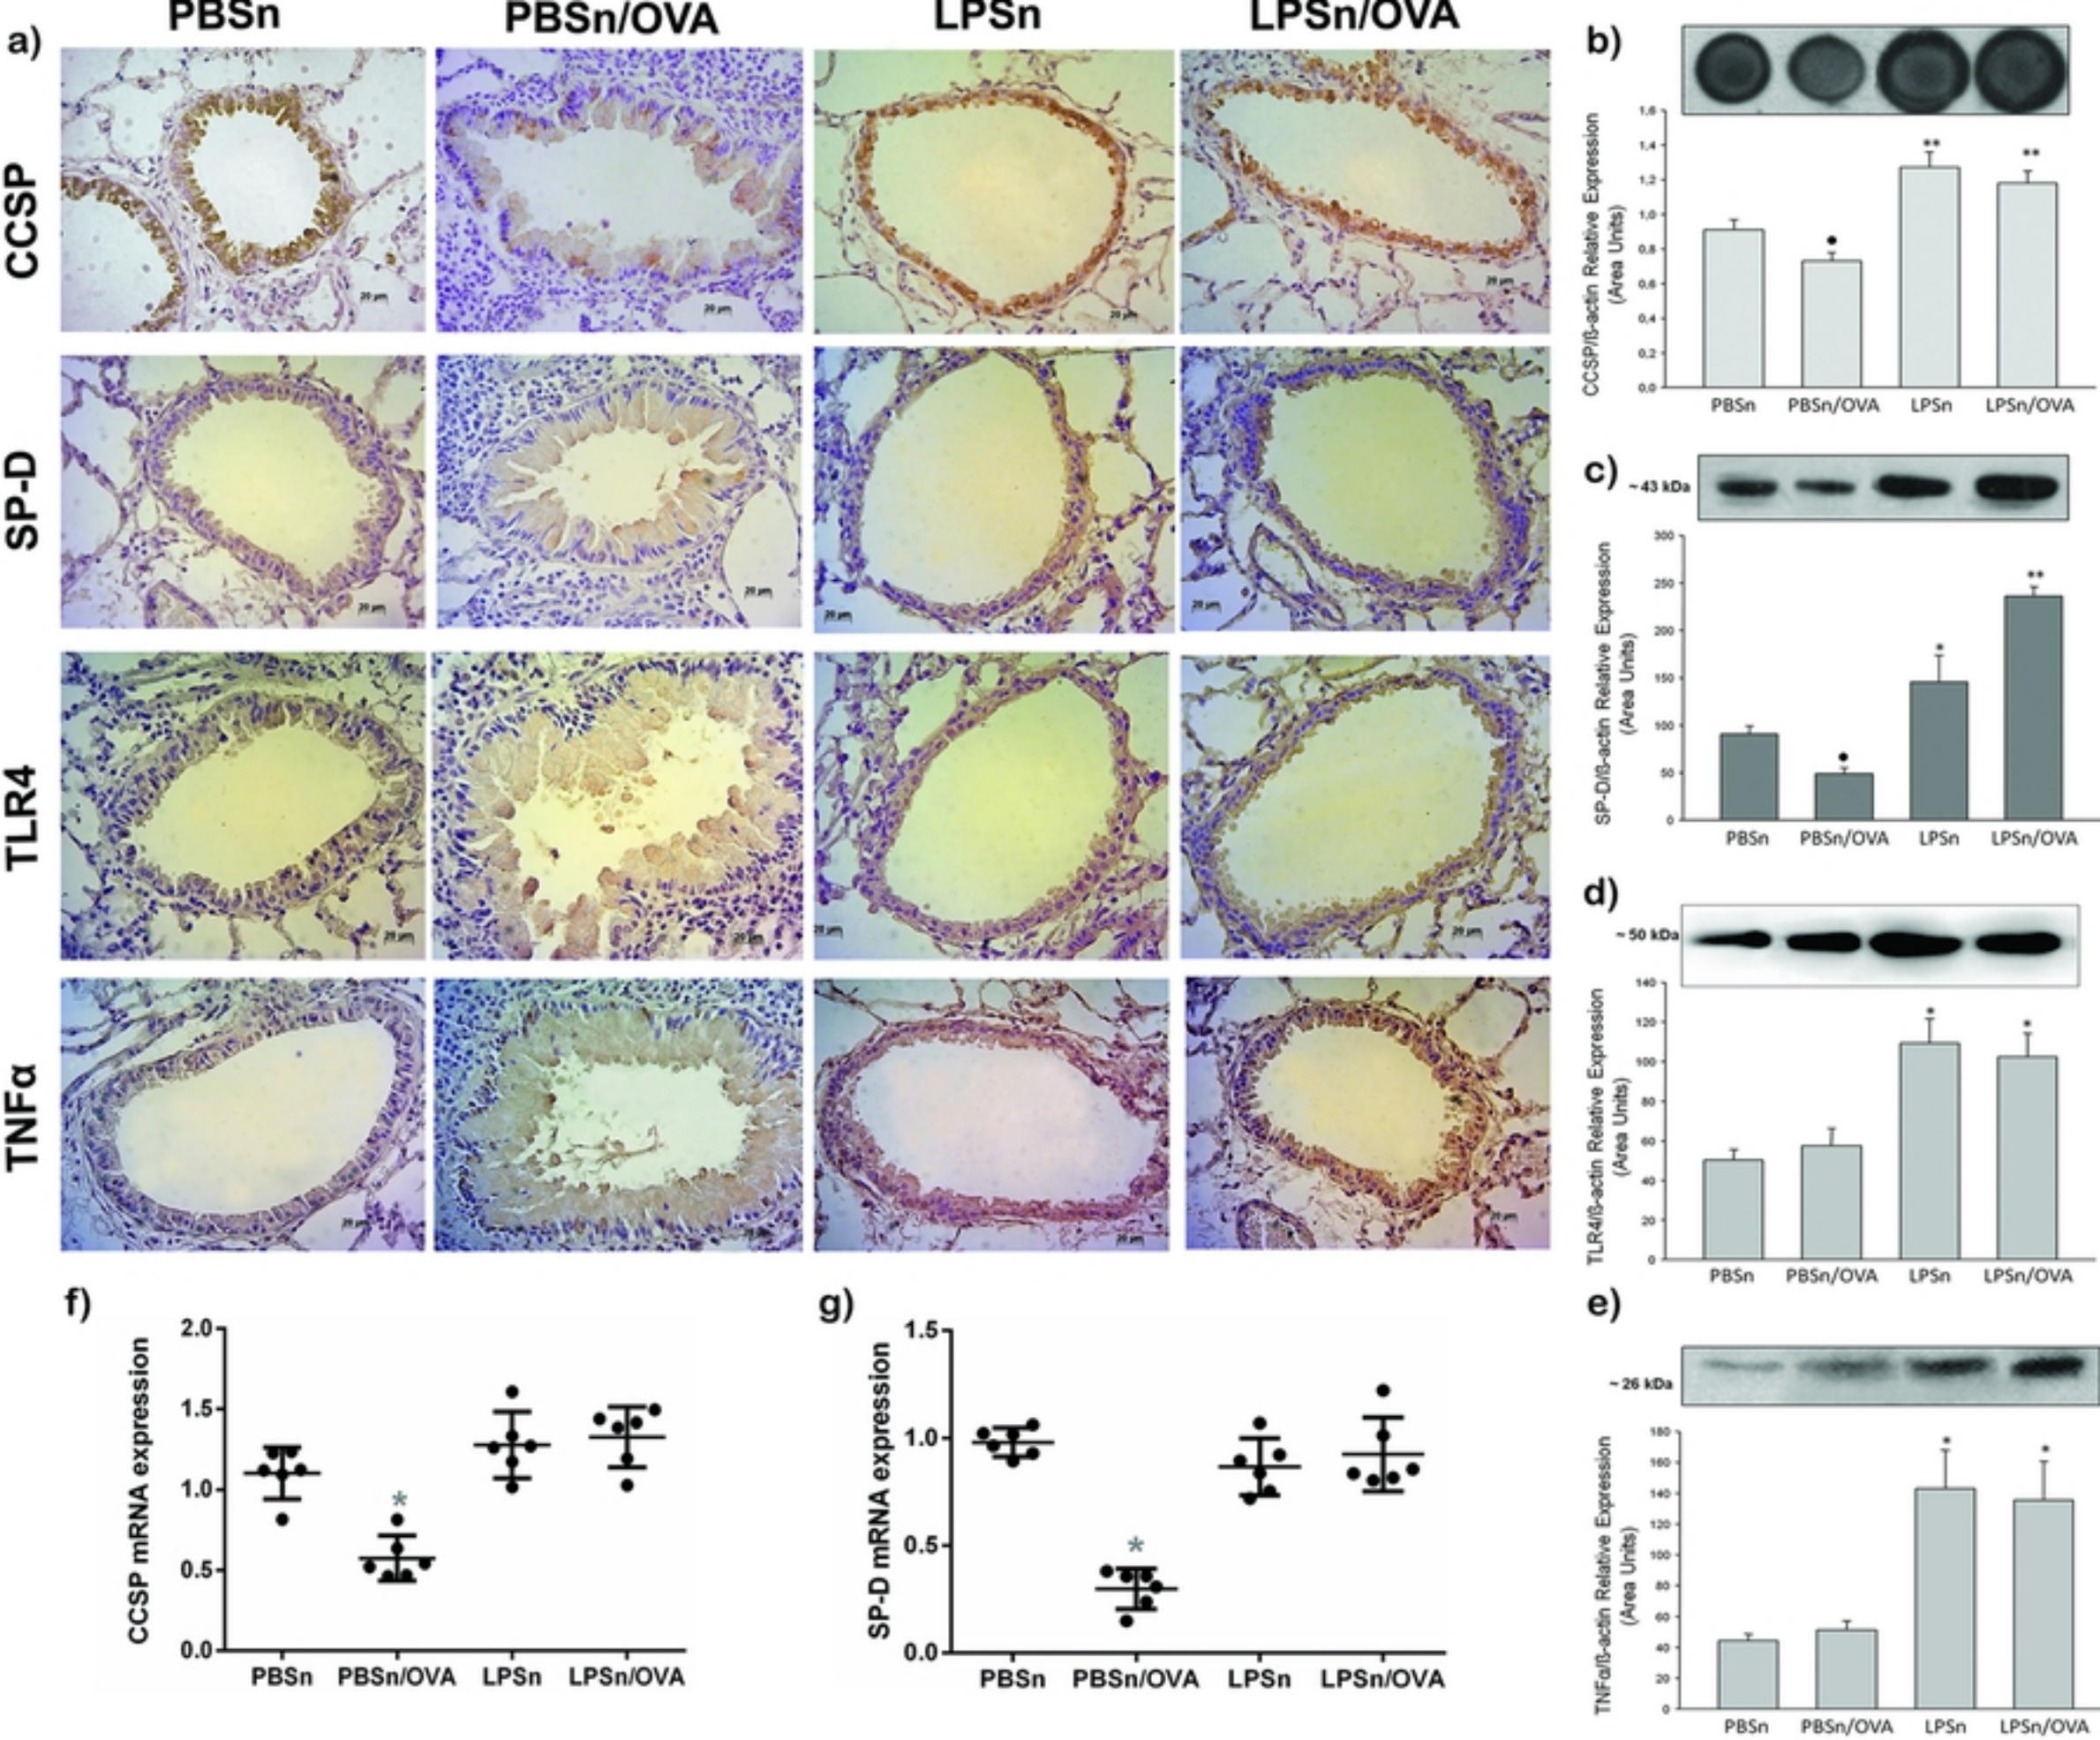

Figure 5



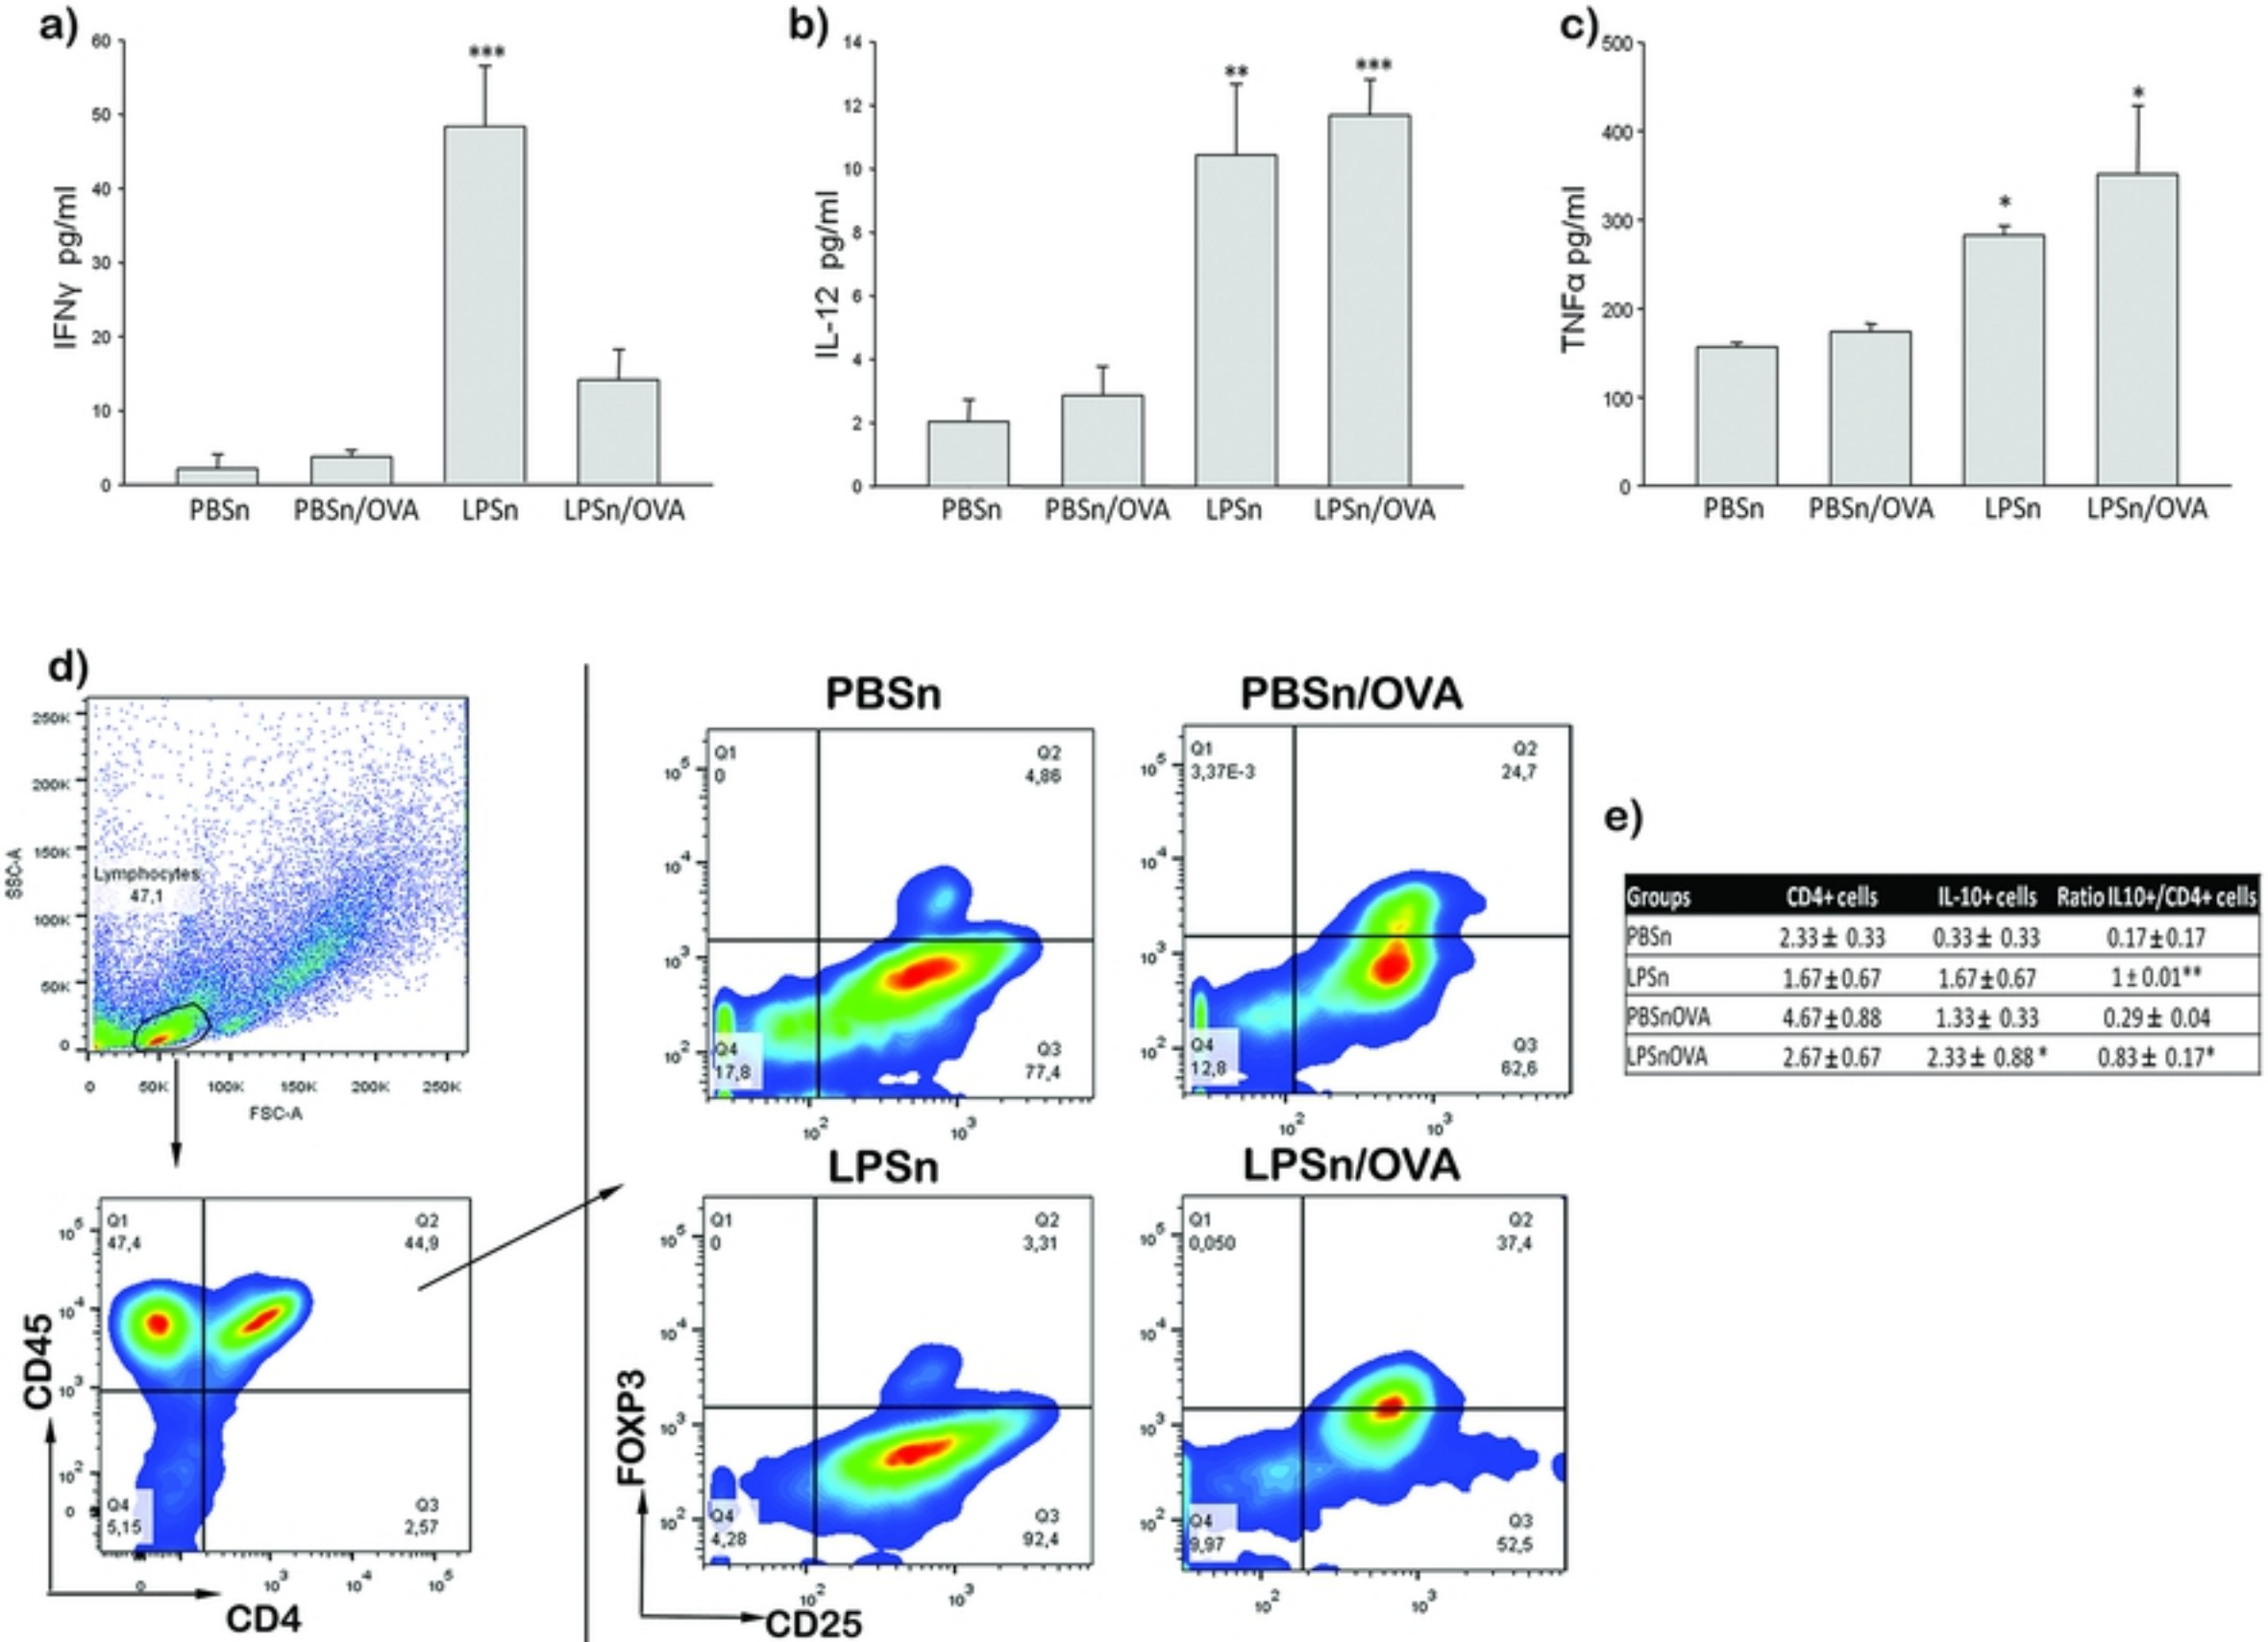

Figure 2
